# Supplementary material for: Interferon Beta Activity Is Modulated via Binding of Specific S100 Proteins
Source: PubMed Central journal article supplement (PMC7764042; doi:10.3390/ijms21249473), 2020-12-13
Supplement: ijms-21-09473-s001.pdf [file ijms-21-09473-s001.pdf]

# Supplementary Materials

## Interferon beta activity is modulated via binding of specific S100 proteins

Alexey S. Kazakov <sup>1</sup>, Alexander D. Sofin <sup>1</sup>, Nadezhda V. Avkhacheva <sup>1</sup>, Alexander I. Denesyuk <sup>1,2</sup>, Evgenia I. Deryusheva <sup>1</sup>, Victoria A. Rastrygina <sup>1</sup>, Andrey S. Sokolov <sup>1</sup>, Maria E. Permyakova <sup>1</sup>, Ekaterina A Litus <sup>1</sup>, Vladimir N. Uversky <sup>1,3,\*</sup>, Eugene A. Permyakov <sup>1</sup>, and Sergei E. Permyakov <sup>1,\*</sup>

<sup>1</sup> Institute for Biological Instrumentation, Pushchino Scientific Center for Biological Research of the Russian Academy of Sciences, Pushchino, Moscow region, 142290 Russian Federation; [fenixfly@yandex.ru](mailto:fenixfly@yandex.ru) (ASK), [AlSofin@mail.ru](mailto:AlSofin@mail.ru) (ADS), [avkhacheva@gmail.com](mailto:avkhacheva@gmail.com) (NVA), [adenesyu@abo.fi](mailto:adenesyu@abo.fi) (AID), [janed1986@ya.ru](mailto:janed1986@ya.ru) (EID), [certusfides@gmail.com](mailto:certusfides@gmail.com) (VAR), [212sok@gmail.com](mailto:212sok@gmail.com) (ASS), [mperm1977@gmail.com](mailto:mperm1977@gmail.com) (MEP), [ealitus@gmail.com](mailto:ealitus@gmail.com) (EAL), [epermyak@yandex.ru](mailto:epermyak@yandex.ru) (EAP), [permyakov.s@gmail.com](mailto:permyakov.s@gmail.com) (SEP)

<sup>2</sup> Structural Bioinformatics Laboratory, Biochemistry, Faculty of Science and Engineering, Åbo Akademi University, Turku, 20520 Finland; [adenesyu@abo.fi](mailto:adenesyu@abo.fi)

<sup>3</sup> Department of Molecular Medicine and USF Health Byrd Alzheimer's Research Institute, Morsani College of Medicine, University of South Florida, Tampa, FL, USA; [vuversky@usf.edu](mailto:vuversky@usf.edu)

\* Correspondence: Dr. Sergei E. Permyakov, Institute for Biological Instrumentation, Pushchino Scientific Center for Biological Research of the Russian Academy of Sciences, Institutskaya str., 7, Pushchino, Moscow region, 142290 Russia; Email: [permyakov.s@gmail.com](mailto:permyakov.s@gmail.com); Tel: +7 (495) 143-7741; Fax: +7(4967) 33 05 22; Prof. Vladimir N. Uversky, Department of Molecular Medicine and USF Health Byrd Alzheimer's Research Institute, Morsani College of Medicine, University of South Florida, Tampa, FL 33612, USA; Email: [vuversky@usf.edu](mailto:vuversky@usf.edu)

**Figure S1.** Multiple sequence alignment of human S100 proteins analyzed in this study using the Clustal Omega algorithm (A), Percent Identity Matrix (B), and corresponding evolutionary tree (C).

**A**

CLUSTAL O(1.2.4) multiple sequence alignment

```

sp|P25815|S100P_HUMAN      -----MTELETAMGMIIDVFSRYSGSEGSTQTLTKGELKVLMEKELPGFLQ      46
sp|P23297|S10A1_HUMAN     -----MGSELETAMETLINVFHAHSGKEGDKYKLSKKELKELLQTELSGFLD      47
sp|P26447|S10A4_HUMAN     -----MACPLEKALDVMVSTFHKYSGKEGDKFKLNKSELKELLTRELPSFLG      47
sp|P06703|S10A6_HUMAN     -----MACPLDQAIGLLVAIFHKYSGREGDKHTLSKKELKELIQKELT--IG      45
sp|P04271|S100B_HUMAN     -----MSELEKAMVALIDVFHQYSGREGDKHKLKKSELKELINNELSHFLE      46
sp|P31151|S10A7_HUMAN     -----MSNTQAERSIIGMIDMFHKYTRRDD---KIEKPSLLTMMKENFPNFLS      45
sp|P05109|S10A8_HUMAN     -----MLTELEKALNSIIDVYHKYSLIKGNFHAVYRDDLKKLLETCEPQYIR      47
sp|P06702|S10A9_HUMAN     -----MTCKMSQLERNIETIINTFQYSVKLGHPDTLNQGEFKELVVRKDLQNFLK      50
sp|P60903|S10AA_HUMAN     -----MPSQMEHAMETMMFTFHKFAGDKG---YLTKEDLRLVMEKEFPGFLE      44
sp|P31949|S10AB_HUMAN     -----MAKISSPTETERCIESLIAVFQKYAGKDGNYNLTLSKTEFLSFMNTELAATK      52
sp|P80511|S10AC_HUMAN     -----MTKLEEHLEGIVNIFHQYSVRKGFHDTLSKSELKQLLTKELANTIK      46
sp|Q99584|S10AD_HUMAN     -----MAAEPLTELEESIETVTFFTFARQEGRKDSLSEVFEKELVTQQLPHLLK      51
sp|Q9HCY8|S10AE_HUMAN     MGQCRSANAEDAQEFSDVERAIETLIKNFHQYS-VEGGKETLTPSELRLVLTQQLPHLMP      59
sp|Q86SG5|S1A7A_HUMAN     -----MSNTQAERSIIGMIDMFHKYTRRDD---KIEKPSLLTMMKENFPNFLS      45
                                     :  :  ::  :  .:  .  :  .:  ::  :

```

```

sp|P25815|S100P_HUMAN      SG--KDKDAVDKLLKDLKDANGDAQVDFSEFIVFVAAITSACHKYFEKAGLK-----      95
sp|P23297|S10A1_HUMAN     AQ--KDVDADVDKVMKELDENGDEGEVDFQEYVVVLAALTVACNNFFWENS-----      94
sp|P26447|S10A4_HUMAN     KR--TDEAAFQKLMNSNLDNRDNEVDFQEYCVFLSCIAMCNEFFEGFPDKQPRKK----      101
sp|P06703|S10A6_HUMAN     SK--LQDAEIARLMEDLDRNKDQEVNFQEYVTFGLGALALIYNEALKG-----      90
sp|P04271|S100B_HUMAN     EI--KEQEVVDKVMETLDNDGDGECDFQEFMAFVAMVTTACHEFFEHE-----      92
sp|P31151|S10A7_HUMAN     ACDKKGNTYLADVFEEKDKNEDKKIDFSEFLSLLGDIATDYHKQSHGAAPCSGGSQ----      101
sp|P05109|S10A8_HUMAN     KK-----GADVWFKELDINTDGAVNFQEFLLVLIKMGVAAHKKSHEESHKE-----      93
sp|P06702|S10A9_HUMAN     KEN-KNEKVIIEHIMEDLDTNADKQLSFEFIMLMARLTWASHEKMHGEGDEGPGHHHKPGL      109
sp|P60903|S10AA_HUMAN     NQ--KDPLAVDKIMKDLQCRDQKGVGFQSFSLIAGLTIACNDYFVVMKQKQKGGK----      97
sp|P31949|S10AB_HUMAN     NQ--KDPGVLDRMMKKLDTNSDGLDFSEFLNLIIGLAMACHDSFLKAVPSQKRT----      105
sp|P80511|S10AC_HUMAN     NI--KDKAVIDEIFQGLDANQDEQVDFQEFISLVAIALKAAHYHHTHKE-----      92
sp|Q99584|S10AD_HUMAN     DV-----GSLDEKMKSLDVNQDSELKFNEYWRILIGELAKEIRKKK----DLKIRKK----      98
sp|Q9HCY8|S10AE_HUMAN     SN-----CGLEEKIANLGCNSDKLEFRSFWELIGEAAKSVKLER----PVRGH-----      104
sp|Q86SG5|S1A7A_HUMAN     ACDKKGIIHYLATVFEEKDKNEDKKIDFSEFLSLLGDIADYHKQSHGAAPCSGGSQ----      101
                                     :  .  *  *  .:  ::  .

```

```

sp|P25815|S100P_HUMAN      ----- 95
sp|P23297|S10A1_HUMAN     ----- 94
sp|P26447|S10A4_HUMAN     ----- 101
sp|P06703|S10A6_HUMAN     ----- 90
sp|P04271|S100B_HUMAN     ----- 92
sp|P31151|S10A7_HUMAN     ----- 101
sp|P05109|S10A8_HUMAN     ----- 93
sp|P06702|S10A9_HUMAN     GEGTP 114
sp|P60903|S10AA_HUMAN     ----- 97
sp|P31949|S10AB_HUMAN     ----- 105
sp|P80511|S10AC_HUMAN     ----- 92
sp|Q99584|S10AD_HUMAN     ----- 98
sp|Q9HCY8|S10AE_HUMAN     ----- 104
sp|Q86SG5|S1A7A_HUMAN     ----- 101

```

# B

#  
#  
# Percent Identity Matrix - created by Clustal2.1  
#  
#

|                       |        |        |        |        |        |        |        |        |        |        |        |        |        |        |
|-----------------------|--------|--------|--------|--------|--------|--------|--------|--------|--------|--------|--------|--------|--------|--------|
| sp P25815 S100P_HUMAN | 100.00 | 52.69  | 41.05  | 34.83  | 50.00  | 27.17  | 36.26  | 35.79  | 43.48  | 38.95  | 44.57  | 26.14  | 24.14  | 29.35  |
| sp P23297 S10A1_HUMAN | 52.69  | 100.00 | 48.94  | 43.33  | 57.61  | 20.88  | 37.78  | 36.17  | 47.25  | 40.43  | 36.96  | 34.48  | 25.58  | 23.08  |
| sp P26447 S10A4_HUMAN | 41.05  | 48.94  | 100.00 | 51.11  | 45.65  | 22.45  | 29.03  | 27.72  | 34.02  | 28.00  | 32.61  | 32.98  | 25.27  | 24.49  |
| sp P06703 S10A6_HUMAN | 34.83  | 43.33  | 51.11  | 100.00 | 39.33  | 22.99  | 27.91  | 30.00  | 26.44  | 28.89  | 34.83  | 30.59  | 26.19  | 25.29  |
| sp P04271 S100B_HUMAN | 50.00  | 57.61  | 45.65  | 39.33  | 100.00 | 25.84  | 34.09  | 36.96  | 37.08  | 34.78  | 38.04  | 26.74  | 28.24  | 26.97  |
| sp P31151 S10A7_HUMAN | 27.17  | 20.88  | 22.45  | 22.99  | 25.84  | 100.00 | 24.44  | 24.00  | 22.68  | 32.65  | 25.84  | 19.57  | 21.35  | 94.06  |
| sp P05109 S10A8_HUMAN | 36.26  | 37.78  | 29.03  | 27.91  | 34.09  | 24.44  | 100.00 | 25.81  | 27.78  | 26.88  | 39.77  | 22.47  | 18.18  | 25.56  |
| sp P06702 S10A9_HUMAN | 35.79  | 36.17  | 27.72  | 30.00  | 36.96  | 24.00  | 25.81  | 100.00 | 29.90  | 32.04  | 46.74  | 30.93  | 29.79  | 25.00  |
| sp P60903 S10AA_HUMAN | 43.48  | 47.25  | 34.02  | 26.44  | 37.08  | 22.68  | 27.78  | 29.90  | 100.00 | 36.08  | 31.46  | 26.67  | 27.27  | 24.74  |
| sp P31949 S10AB_HUMAN | 38.95  | 40.43  | 28.00  | 28.89  | 34.78  | 32.65  | 26.88  | 32.04  | 36.08  | 100.00 | 35.87  | 32.99  | 25.00  | 34.69  |
| sp P80511 S10AC_HUMAN | 44.57  | 36.96  | 32.61  | 34.83  | 38.04  | 25.84  | 39.77  | 46.74  | 31.46  | 35.87  | 100.00 | 32.56  | 27.06  | 26.97  |
| sp Q99584 S10AD_HUMAN | 26.14  | 34.48  | 32.98  | 30.59  | 26.74  | 19.57  | 22.47  | 30.93  | 26.67  | 32.99  | 32.56  | 100.00 | 36.84  | 19.57  |
| sp Q9HCY8 S10AE_HUMAN | 24.14  | 25.58  | 25.27  | 26.19  | 28.24  | 21.35  | 18.18  | 29.79  | 27.27  | 25.00  | 27.06  | 36.84  | 100.00 | 22.47  |
| sp Q86SG5 S1A7A_HUMAN | 29.35  | 23.08  | 24.49  | 25.29  | 26.97  | 94.06  | 25.56  | 25.00  | 24.74  | 34.69  | 26.97  | 19.57  | 22.47  | 100.00 |

# C

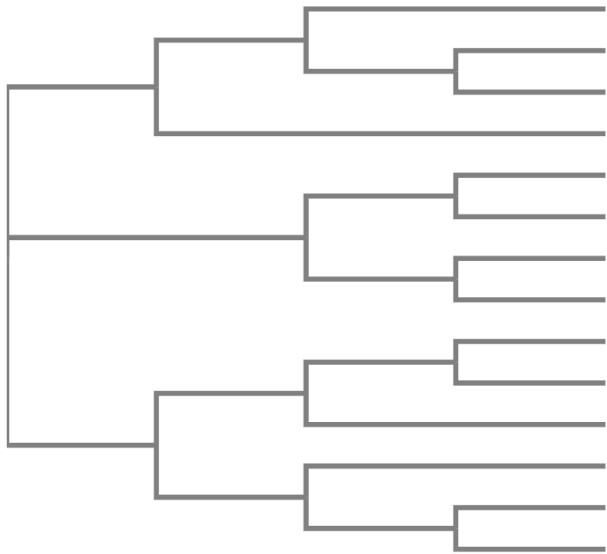

sp|P25815|S100P\_HUMAN 0.24536  
 sp|P23297|S10A1\_HUMAN 0.19757  
 sp|P04271|S100B\_HUMAN 0.22634  
 sp|P60903|S10AA\_HUMAN 0.31537  
 sp|P26447|S10A4\_HUMAN 0.23432  
 sp|P06703|S10A6\_HUMAN 0.25457  
 sp|Q99584|S10AD\_HUMAN 0.30008  
 sp|Q9HCY8|S10AE\_HUMAN 0.3315  
 sp|P31151|S10A7\_HUMAN 0.03733  
 sp|Q86SG5|S1A7A\_HUMAN 0.02208  
 sp|P31949|S10AB\_HUMAN 0.28895  
 sp|P05109|S10A8\_HUMAN 0.35731  
 sp|P06702|S10A9\_HUMAN 0.28643  
 sp|P80511|S10AC\_HUMAN 0.24618

## Supplementary files

Protein Data Bank files of the models of tertiary structures of INF- $\beta$  complexes with S100A1/A4/A6/P proteins (**Figure 9**), constructed as described in *Materials and Methods* section.

Model of S100A1-IFN $\beta$  complex.pdb

Model of S100A4-IFN $\beta$  complex.pdb

Model of S100A6-IFN $\beta$  complex.pdb

Model of S100P-IFN $\beta$  complex.pdb

**Table S1.** Molar extinction coefficients at 280 nm for the proteins used in the present study, calculated according to ref. (Pace, Vajdos et al. 1995).

| <i>Protein</i>                         | $\epsilon_{280nm}, M^{-1}cm^{-1}$ |
|----------------------------------------|-----------------------------------|
| IFN- $\beta$                           | 31,525                            |
| IFN- $\alpha$                          | 18,700                            |
| S100A1                                 | 8,480                             |
| S100A4<br>S100A10<br>S100A12           | 2,980                             |
| S100A6<br>S100A7<br>S100A11<br>S100A15 | 4,470                             |
| S100A8                                 | 11,460                            |
| S100A9<br>S100A13<br>S100A14           | 6,990                             |
| S100B                                  | 1,490                             |

**Table S2.** List of the human diseases associated with IFN- $\beta$  and S100A1 protein, according to DisGeNET database (<http://www.disgenet.org>). PubMed identifiers of the references confirming the protein-disease associations are indicated.

| <i>Nº</i> | <i>Disease</i>                        | <i>IFN-<math>\beta</math></i>                                                                                                                                                                                                                                                    | <i>S100A1</i>                                                                 |
|-----------|---------------------------------------|----------------------------------------------------------------------------------------------------------------------------------------------------------------------------------------------------------------------------------------------------------------------------------|-------------------------------------------------------------------------------|
| 1         | Cardiomyopathy, Dilated               | 20350703                                                                                                                                                                                                                                                                         | 22336719                                                                      |
| 2         | Encephalopathies                      | 8615598                                                                                                                                                                                                                                                                          | 28072884                                                                      |
| 3         | Vitiligo                              | 28752785                                                                                                                                                                                                                                                                         | 15095274                                                                      |
| 4         | Tumor Cell Invasion                   | 29618645; 28317173; 25486572                                                                                                                                                                                                                                                     | 30216200; 22834835;<br>20819668                                               |
| 5         | Malignant neoplasm of ovary           | 11896621                                                                                                                                                                                                                                                                         | 31033462; 30558666;<br>15277215                                               |
| 6         | Non-Small Cell Lung Carcinoma         | 30622322; 26431376; 23658645                                                                                                                                                                                                                                                     | 29607329; 17689067                                                            |
| 7         | Coronary Artery Disease               | 25882064                                                                                                                                                                                                                                                                         | 31523180; 26515415                                                            |
| 8         | Brain Diseases                        | 12618863; 8615598                                                                                                                                                                                                                                                                | 30392897                                                                      |
| 9         | Neoplasms                             | 31512776; 31776268; 30683475;<br>31070806; 31627888; 30848981;<br>31036052; 30393160; 31358054;<br>31431457; 30675668; 30679806;<br>30622322; 29750542; 30012853;<br>29849115; 28912136; 28337378;<br>28514874; 27188205; 28578991;<br>28098415; 28483787; 27399807;<br>26880763 | 30710303                                                                      |
| 10        | Primary malignant neoplasm            | 30864696; 30613977; 31167402;<br>31348591; 30679806; 31036052;<br>30446226; 29750542; 29158470;<br>27637889; 29229854; 28214639;<br>28912136; 28129467; 26597133;<br>27077807; 26880763; 27496321;<br>27532609; 24141111; 23403306;<br>22522623; 22842821; 21226949;<br>22106296 | 30710273; 28595036;<br>25614008; 19926575;<br>17523080; 15336958;<br>12445462 |
| 11        | Malignant Neoplasms                   | 30864696; 30679806; 31348591;<br>31036052; 31167402; 30613977;<br>30446226; 29158470; 29750542;<br>28214639; 26597133; 29229854;<br>28912136; 28129467; 27637889;<br>27532609; 26880763; 27496321;<br>27077807; 24141111; 23403306;<br>22522623; 22842821; 22106296;<br>21226949 | 30710273; 28051137;<br>28595036; 25614008;<br>19926575; 17523080;<br>15336958 |
| 12        | Renal Cell Carcinoma                  | 22344395; 18695887; 15546502;<br>12631618                                                                                                                                                                                                                                        | 25597876; 19680475;<br>17394501; 17483815;<br>17483815; 11734338              |
| 13        | Malignant neoplasm of urinary bladder | 11948141; 2297754                                                                                                                                                                                                                                                                | 17970044                                                                      |

|    |                                                |                                                                                                                       |                                                  |
|----|------------------------------------------------|-----------------------------------------------------------------------------------------------------------------------|--------------------------------------------------|
| 14 | Malignant neoplasm of stomach                  | 22159640                                                                                                              | 30414696; 25266115; 22295074; 18793447; 17400182 |
| 15 | Amyloidosis                                    | 30222725                                                                                                              | 24931125                                         |
| 16 | Malignant neoplasm of lung                     | 30683475; 30622322; 30446226; 26351076; 25486572; 19893592; 19564073; 2560625                                         | 29146477                                         |
| 17 | Tumor Progression                              | 31821828; 28849002                                                                                                    | 21153724                                         |
| 18 | Malignant neoplasm of pancreas                 | 23807450                                                                                                              | 12950018                                         |
| 19 | Conventional (Clear Cell) Renal Cell Carcinoma | 22344395; 18695887; 15546502; 12631618                                                                                | 11734338                                         |
| 20 | Secondary malignant neoplasm of lymph node     | 30672717; 23358428                                                                                                    | 28595036                                         |
| 21 | Alzheimer's Disease                            | 30610591; 31152860; 31233762; 30076830; 30222725; 24262201                                                            | 31156365; 31079281; 24931125                     |
| 22 | Malignant neoplasm of breast                   | 31167402; 26716512; 27077807; 24141111; 18608205; 18608205                                                            | 30018736; 28051137; 21153724                     |
| 23 | Coronary heart disease                         | 25882064                                                                                                              | 31523180                                         |
| 24 | Liver carcinoma                                | 28456632; 23887606; 22790964; 19911974; 18618506; 18083266; 12395321                                                  | 29901195                                         |
| 25 | Squamous cell carcinoma of esophagus           | 23639140; 21452064                                                                                                    | 15185146                                         |
| 26 | Bladder Neoplasm                               | 11948141; 2297754                                                                                                     | 17523080; 17970044                               |
| 27 | Breast Carcinoma                               | 31167402; 27207649; 27077807; 26716512; 25884794; 24141111; 18608205; 18608205; 9059994                               | 30018736; 28051137; 21153724; 16273201           |
| 28 | Neoplasm Metastasis                            | 31070806; 30213181; 29202279; 28129467; 26716512; 26102027; 20197756; 12405292; 11948141; 11498771; 10029078; 9815626 | 15608682                                         |

**Table S3.** List of the human diseases associated with IFN- $\beta$  and S100A1 protein, according to Open Targets Platform database (<https://www.opentargets.org>), and corresponding association scores (<https://docs.targetvalidation.org/getting-started/scoring>). Diseases with association scores for the both proteins exceeding 0.1 are highlighted in yellow.

| <i>Nº</i> | <i>Disease</i>                          | <i>IFN-<math>\beta</math></i> | <i>S100A1</i> |
|-----------|-----------------------------------------|-------------------------------|---------------|
| 1         | amyloidosis                             | 0.013                         | 0.024         |
| 2         | weight loss                             | 0.022                         | 0.025         |
| 3         | vasculitis                              | 0.043                         | 0.024         |
| 4         | chronic obstructive pulmonary disease   | 0.087                         | 0.012         |
| 5         | psoriasis                               | 0.056                         | 0.02          |
| 6         | hepatocellular carcinoma                | 0.112                         | 0.073         |
| 7         | gastric adenocarcinoma                  | 0.026                         | 0.363         |
| 8         | diarrheal disease                       | 0.035                         | 0.024         |
| 9         | inflammation                            | 0.102                         | 0.061         |
| 10        | urethral intrinsic sphincter deficiency | 0.043                         | 0.018         |
| 11        | arthritis                               | 0.13                          | 0.028         |
| 12        | idiopathic pulmonary fibrosis           | 0.031                         | 0.193         |
| 13        | atherosclerosis                         | 0.052                         | 0.015         |
| 14        | glioblastoma multiforme                 | 0.676                         | 0.031         |
| 15        | neuroblastoma                           | 0.082                         | 0.01          |
| 16        | cancer                                  | 0.839                         | 0.538         |
| 17        | ovarian carcinoma                       | 0.697                         | 0.082         |
| 18        | hyperplasia                             | 0.051                         | 0.018         |
| 19        | urinary bladder cancer                  | 0.06                          | 0.049         |
| 20        | breast cancer                           | 0.716                         | 0.046         |
| 21        | medulloblastoma                         | 0.042                         | 0.062         |
| 22        | shock                                   | 0.044                         | 0.016         |
| 23        | cervical cancer                         | 0.047                         | 0.036         |
| 24        | hypoxia                                 | 0.046                         | 0.064         |
| 25        | infectious disease                      | 0.295                         | 0.198         |
| 26        | nervousness                             | 0.066                         | 0.018         |
| 27        | cardiomyopathy                          | 0.283                         | 0.192         |
| 28        | renal cell adenocarcinoma               | 0.078                         | 0.061         |
| 29        | vascular disease                        | 0.228                         | 0.322         |
| 30        | heart disease                           | 0.283                         | 0.312         |
| 31        | cerebral infarction                     | 0.045                         | 0.011         |
| 32        | myocardial infarction                   | 0.024                         | 0.07          |
| 33        | endometrial carcinoma                   | 0.061                         | 0.031         |
| 34        | colorectal carcinoma                    | 0.063                         | 0.011         |



|    |                                        |       |       |
|----|----------------------------------------|-------|-------|
| 35 | hyperglycemia                          | 0.012 | 0.016 |
| 36 | atopic eczema                          | 0.013 | 0.011 |
| 37 | obesity                                | 0.198 | 0.02  |
| 38 | gastric carcinoma                      | 0.042 | 0.367 |
| 39 | ischemia reperfusion injury            | 0.023 | 0.026 |
| 40 | clear cell renal carcinoma             | 0.024 | 0.013 |
| 41 | neoplasm                               | 0.85  | 0.586 |
| 42 | acromegaly                             | 0.038 | 0.01  |
| 43 | malignant pancreatic neoplasm          | 0.058 | 0.011 |
| 44 | breast adenocarcinoma                  | 0.029 | 0.011 |
| 45 | hypersensitivity reaction disease      | 0.261 | 0.044 |
| 46 | substance dependence                   | 0.062 | 0.027 |
| 47 | metastatic melanoma                    | 0.05  | 0.009 |
| 48 | glioma                                 | 0.788 | 0.021 |
| 49 | potassium-aggravated myotonia          | 0.044 | 0.018 |
| 50 | anaplastic astrocytoma                 | 0.045 | 0.011 |
| 51 | juvenile idiopathic arthritis          | 0.011 | 0.013 |
| 52 | cardiotoxicity                         | 0.013 | 0.05  |
| 53 | type I diabetes mellitus               | 0.048 | 0.039 |
| 54 | primitive neuroectodermal tumor        | 0.083 | 0.021 |
| 55 | Fanconi anemia complementation group E | 0.014 | 0.015 |
| 56 | complication                           | 0.078 | 0.011 |
| 57 | cardiac hypertrophy                    | 0.011 | 0.041 |
| 58 | Alzheimer's disease                    | 0.044 | 0.04  |
| 59 | dermatomyositis                        | 0.071 | 0.02  |
| 60 | hypertension                           | 0.102 | 0.314 |
| 61 | kidney neoplasm                        | 0.199 | 0.066 |
| 62 | nervous system disease                 | 0.85  | 0.322 |
| 63 | heart failure                          | 0.015 | 0.303 |
| 64 | dilated cardiomyopathy                 | 0.257 | 0.02  |
| 65 | necrosis                               | 0.064 | 0.012 |
| 66 | infertility                            | 0.203 | 0.021 |
| 67 | tongue neoplasm                        | 0.043 | 0.01  |
| 68 | pulmonary arterial hypertension        | 0.102 | 0.309 |
| 69 | refractory drug response               | 0.025 | 0.012 |
| 70 | non-small cell lung carcinoma          | 0.646 | 0.004 |
| 71 | cardiac arrhythmia                     | 0.031 | 0.026 |
| 72 | stomach neoplasm                       | 0.064 | 0.368 |
| 73 | autoimmune retinopathy                 | 0.01  | 0.01  |

|    |                                    |       |       |
|----|------------------------------------|-------|-------|
| 74 | cutaneous melanoma                 | 0.038 | 0.02  |
| 75 | cirrhosis of liver                 | 0.061 | 0.2   |
| 76 | nicotine dependence                | 0.06  | 0.013 |
| 77 | dysplasia                          | 0.029 | 0.017 |
| 78 | squamous cell carcinoma            | 0.055 | 0.43  |
| 79 | carcinoma                          | 0.839 | 0.537 |
| 80 | tetanus                            | 0.033 | 0.011 |
| 81 | diabetes mellitus                  | 0.05  | 0.196 |
| 82 | injury                             | 0.075 | 0.036 |
| 83 | ischemia                           | 0.053 | 0.035 |
| 84 | esophageal squamous cell carcinoma | 0.04  | 0.01  |
| 85 | glomerulonephritis (disease)       | 0.048 | 0.01  |
| 86 | adenocarcinoma                     | 0.783 | 0.383 |
| 87 | lung carcinoma                     | 0.646 | 0.424 |
| 88 | myocarditis                        | 0.049 | 0.012 |
| 89 | ulcerative colitis                 | 0.05  | 0.024 |
| 90 | astrocytoma                        | 0.676 | 0.015 |
| 91 | uveal melanoma                     | 0.037 | 0.024 |
| 92 | sepsis                             | 0.155 | 0.007 |
| 93 | melanoma                           | 0.141 | 0.047 |
| 94 | lymph node metastatic carcinoma    | 0.029 | 0.037 |

**Table S4.** List of the human diseases associated with IFN- $\beta$  and S100A4 protein, according to DisGeNET database (<http://www.disgenet.org>). PubMed identifiers of the references confirming the protein-disease associations are indicated.

| <i>N<sup>o</sup></i> | <i>Disease</i>                             | <i>IFN-<math>\beta</math></i>                                                                                                                                | <i>S100A4</i>                                                                                                                                                                                                                                |
|----------------------|--------------------------------------------|--------------------------------------------------------------------------------------------------------------------------------------------------------------|----------------------------------------------------------------------------------------------------------------------------------------------------------------------------------------------------------------------------------------------|
| 1                    | Cervix carcinoma                           | 10521926                                                                                                                                                     | 28921916                                                                                                                                                                                                                                     |
| 2                    | Cervical cancer                            | 10521926                                                                                                                                                     | 28921916                                                                                                                                                                                                                                     |
| 3                    | Malignant neoplasm of urinary bladder      | 11948141; 2297754                                                                                                                                            | 29218245; 26508026; 11839590                                                                                                                                                                                                                 |
| 4                    | Pancreatic carcinoma                       | 23807450                                                                                                                                                     | 31526392; 29578167; 25677816; 24732359; 25072505; 23026527; 23085231; 19653048; 19799859; 18350635; 17786304; 11786397                                                                                                                       |
| 5                    | Glioblastoma Multiforme                    | 29557060; 29159280; 28912136; 28098415; 27637889; 27194146; 25920530; 26441059; 24526161; 23384727; 20606645; 19197327; 18714312; 14965379; 1653364; 1998958 | 28807938; 19074870                                                                                                                                                                                                                           |
| 6                    | Respiratory Distress Syndrome, Adult       | 29365277                                                                                                                                                     | 25070658                                                                                                                                                                                                                                     |
| 7                    | Renal Cell Carcinoma                       | 22344395; 18695887; 15546502; 12631618                                                                                                                       | 19365673                                                                                                                                                                                                                                     |
| 8                    | Crohn Disease                              | 29358708                                                                                                                                                     | 20489045                                                                                                                                                                                                                                     |
| 9                    | Prostate carcinoma                         | 29435019; 26339361; 25075566; 23790156; 22429371; 16989575; 17088978; 12231540; 11498771                                                                     | 30041429; 27566074; 28341124; 17219414; 16990429                                                                                                                                                                                             |
| 10                   | Breast Carcinoma                           | 31167402; 27207649; 27077807; 26716512; 25884794; 24141111; 18608205; 18608205; 9059994                                                                      | 30450809; 31709177; 31667000; 29733962; 28058579; 27927689; 27098123; 26285644; 25205038; 25311085; 23543443; 23162804; 22740693; 21195708; 19055112; 15608682; 15956747; 12756252; 14632631; 12517790; 11875708; 11839590; 9751936; 9570150 |
| 11                   | Endometrial Carcinoma                      | 27532609; 21226949; 21868529                                                                                                                                 | 29901152; 24756855; 19506550; 17673926                                                                                                                                                                                                       |
| 12                   | Inflammatory Bowel Diseases                | 27220814                                                                                                                                                     | 30221056; 28935867                                                                                                                                                                                                                           |
| 13                   | Chronic Obstructive Airway Disease         | 31170225; 31260505; 28379462; 22881993; 22543056                                                                                                             | 26483185                                                                                                                                                                                                                                     |
| 14                   | Idiopathic pulmonary arterial hypertension | 31798832; 30639829                                                                                                                                           | 30031694; 23525442                                                                                                                                                                                                                           |
| 15                   | Neoplasm Metastasis                        | 31070806; 30213181; 29202279; 28129467; 26716512; 26102027; 20197756; 12405292; 11948141; 11498771; 10029078; 9815626                                        | 3146723; 130885944; 31709177; 30927479; 31474194; 30745574; 30710284; 31775027; 30893511; 30410586; 29741811; 30221056; 29901152; 29251175; 29449540;                                                                                        |

|    |                                     |                                                                                                                                                                                                                                                                                  |                                                                                                             |
|----|-------------------------------------|----------------------------------------------------------------------------------------------------------------------------------------------------------------------------------------------------------------------------------------------------------------------------------|-------------------------------------------------------------------------------------------------------------|
|    |                                     |                                                                                                                                                                                                                                                                                  | 29544454; 29789685; 29932233;<br>29733962; 29303514 ;30111999;<br>29800090; 28244731; 28058579;<br>27927689 |
| 16 | Rheumatoid Arthritis                | 30291236; 26107769; 23369825;<br>22614743                                                                                                                                                                                                                                        | 31037071; 30710284; 19828600;<br>17328050; 17328050; 17105852                                               |
| 17 | Triple-Negative Breast<br>Carcinoma | 31036052; 29750542; 29229854                                                                                                                                                                                                                                                     | 28247948; 25667103                                                                                          |
| 18 | Melanoma                            | 31356866; 30864696; 30213181;<br>31070806; 28649738; 27677689;<br>28624449; 28877249; 29136453;<br>27399807; 26102027; 26054674;<br>25728676; 23370279; 23358428;<br>23018621; 22555508; 21723255;<br>21846298; 21493591; 18945721;<br>16505900; 16928243; 16343929;<br>12096926 | 29679610; 26928771; 24613382;<br>9703888; 9291441                                                           |
| 19 | Adult Medulloblastoma               | 28559152; 24584142                                                                                                                                                                                                                                                               | 17579622; 12517790                                                                                          |
| 20 | Psoriasis                           | 27438769                                                                                                                                                                                                                                                                         | 30710284; 21712367                                                                                          |
| 21 | Hepatitis A                         | 30594597; 22106296; 16937453;<br>16103148; 12414934                                                                                                                                                                                                                              | 31321478; 28688902                                                                                          |
| 22 | Malignant neoplasm of<br>esophagus  | 12168834                                                                                                                                                                                                                                                                         | 22912541; 22408350; 21889495                                                                                |
| 23 | Malignant neoplasm of<br>ovary      | 11896621                                                                                                                                                                                                                                                                         | 19194111                                                                                                    |
| 24 | Childhood<br>Medulloblastoma        | 28559152; 24584142                                                                                                                                                                                                                                                               | 17579622; 12517790                                                                                          |
| 25 | Liver carcinoma                     | 28456632; 23887606; 22790964;<br>19911974; 18618506; 18083266;<br>12395321                                                                                                                                                                                                       | 30897344; 27544906; 24065232;<br>23483190; 17051636                                                         |
| 26 | Ductal Breast<br>Carcinoma          | 24141111                                                                                                                                                                                                                                                                         | 28223108                                                                                                    |
| 27 | Carcinoma of bladder                | 11948141                                                                                                                                                                                                                                                                         | 29218245; 26508026; 11839590                                                                                |
| 28 | Brain Neoplasms                     | 23384727; 21805051; 19197327;<br>1501894                                                                                                                                                                                                                                         | 17223348                                                                                                    |
| 29 | Malignant tumor of<br>colon         | 31348591; 29496994; 18035482                                                                                                                                                                                                                                                     | 30111999; 29932233; 21403839;<br>21685359; 21795396; 21685359;<br>21289293; 20515499; 17101323              |
| 30 | Glioblastoma                        | 29557060; 27637889; 28098415;<br>29159280; 28912136; 27194146;<br>25920530; 26441059; 26397698;<br>24526161; 23384727; 21805051;<br>20606645; 19197327; 15455376;<br>14965379; 1501894; 1998958;<br>1653364                                                                      | 28807938; 25854377; 19074870;<br>17223348                                                                   |
| 31 | Fatty Liver                         | 29855540                                                                                                                                                                                                                                                                         | 31321478                                                                                                    |
| 32 | Malignant neoplasm of<br>pancreas   | 23807450                                                                                                                                                                                                                                                                         | 29578167; 25677816; 25072505;<br>24732359; 23026527; 23085231;                                              |

|    |                                |                                                                                                                                                                                                                                                                     |                                                                                                                                                                                                                                                                     |
|----|--------------------------------|---------------------------------------------------------------------------------------------------------------------------------------------------------------------------------------------------------------------------------------------------------------------|---------------------------------------------------------------------------------------------------------------------------------------------------------------------------------------------------------------------------------------------------------------------|
|    |                                |                                                                                                                                                                                                                                                                     | 19799859; 19653048; 18350635;<br>17786304; 12874021                                                                                                                                                                                                                 |
| 33 | Esophageal Neoplasms           | 12168834                                                                                                                                                                                                                                                            | 22408350; 22912541; 21889495                                                                                                                                                                                                                                        |
| 34 | Childhood Glioblastoma         | 29557060; 28098415; 29159280;<br>27637889; 27194146; 26441059;<br>25920530; 24526161; 19197327;<br>1998958                                                                                                                                                          | 28807938                                                                                                                                                                                                                                                            |
| 35 | Nephroblastoma                 | 25312909                                                                                                                                                                                                                                                            | 24706305                                                                                                                                                                                                                                                            |
| 36 | Colon Carcinoma                | 31348591; 29496994; 18035482;<br>1586975                                                                                                                                                                                                                            | 30111999; 29932233; 21795396;<br>21685359; 21289293; 21403839;<br>20515499; 17101323; 11875708                                                                                                                                                                      |
| 37 | Mesothelioma                   | 20379224; 20068553; 19773437                                                                                                                                                                                                                                        | 21983934                                                                                                                                                                                                                                                            |
| 38 | Pulmonary Fibrosis             | 28084646                                                                                                                                                                                                                                                            | 29940125; 29910813; 30127784;<br>15618458                                                                                                                                                                                                                           |
| 39 | Astrocytoma                    | 19267105; 15455376; 8174086;<br>8103050; 1906070                                                                                                                                                                                                                    | 25854377                                                                                                                                                                                                                                                            |
| 40 | Lymphoma                       | 22698399                                                                                                                                                                                                                                                            | 7536040                                                                                                                                                                                                                                                             |
| 41 | Stomach Carcinoma              | 22159640                                                                                                                                                                                                                                                            | 29342841; 30410586; 26497012;<br>25310523; 25511023; 19820999;<br>19945782; 12887505; 11106237                                                                                                                                                                      |
| 42 | Adrenoleukodystrophy           | 31662417                                                                                                                                                                                                                                                            | 31321478                                                                                                                                                                                                                                                            |
| 43 | Fibrosis, Liver                | 25715168                                                                                                                                                                                                                                                            | 31321478; 28688902 30328321;<br>25111176 19506550                                                                                                                                                                                                                   |
| 44 | Bladder Neoplasm               | 11948141; 2297754                                                                                                                                                                                                                                                   | 29218245; 26508026; 12532418;<br>11839590                                                                                                                                                                                                                           |
| 45 | Mammary Neoplasms              | 18608205                                                                                                                                                                                                                                                            | 30450809; 17550972; 17550972;<br>16489073; 15856021; 14632631;<br>12439718; 10738249                                                                                                                                                                                |
| 46 | Osteoporosis                   | 25563300; 12944401                                                                                                                                                                                                                                                  | 31814858                                                                                                                                                                                                                                                            |
| 47 | Malignant neoplasm of prostate | 29435019; 26339361; 25075566;<br>23790156; 22429371; 17088978;<br>16989575; 12231540; 11498771                                                                                                                                                                      | 30041429; 28341124; 27566074;<br>17219414; 16990429                                                                                                                                                                                                                 |
| 48 | Leukemia                       | 2295067                                                                                                                                                                                                                                                             | 18452107                                                                                                                                                                                                                                                            |
| 49 | Obesity                        | 29914624; 22951153                                                                                                                                                                                                                                                  | 29789685                                                                                                                                                                                                                                                            |
| 50 | Medulloblastoma                | 28559152; 24584142                                                                                                                                                                                                                                                  | 17579622; 17579622; 12517790;<br>12517790                                                                                                                                                                                                                           |
| 51 | Malignant Neoplasms            | 30864696; 30679806; 31348591;<br>31036052; 31167402; 30613977;<br>30446226; 29750542; 28214639;<br>26597133; 29229854; 28912136;<br>28129467; 27637889; 27532609;<br>26880763; 27496321; 27077807;<br>24141111; 23403306; 22522623;<br>22842821; 22106296; 21226949 | 30868407; 31474194; 30885944;<br>31445888; 30710284; 31623154;<br>30045697; 29556233; 29901152;<br>29069865; 28807938; 28530639;<br>28921916; 28935867; 28247948;<br>27098123; 27793047; 27127879;<br>27278086; 26497012; 24798676;<br>25171474; 24174222; 24039846 |
| 52 | Glioma                         | 31638255; 31100209; 26252165;<br>25175315; 24671169; 24526161;<br>22938469; 21805051; 19893595;<br>18220319; 16343929; 14965379;                                                                                                                                    | 28807938; 25854377; 7898625                                                                                                                                                                                                                                         |

|    |                                            |                                                                                                             |                                                                                                                                                                                                                                                                 |
|----|--------------------------------------------|-------------------------------------------------------------------------------------------------------------|-----------------------------------------------------------------------------------------------------------------------------------------------------------------------------------------------------------------------------------------------------------------|
|    |                                            | 15546502; 11856487; 10982152;<br>10395172; 9875676; 1998958                                                 |                                                                                                                                                                                                                                                                 |
| 53 | Carcinoma of lung                          | 30622322; 31428903; 30683475;<br>30446226; 26351076; 25486572;<br>19893592; 19564073; 2560625               | 30885944; 27127879; 24732359;<br>9066685                                                                                                                                                                                                                        |
| 54 | Fever                                      | 20797409; 10395172                                                                                          | 17497677; 9468217                                                                                                                                                                                                                                               |
| 55 | Myositis                                   | 24757153; 21177291                                                                                          | 21712367                                                                                                                                                                                                                                                        |
| 56 | Colorectal Neoplasms                       | 12405292                                                                                                    | 16097057                                                                                                                                                                                                                                                        |
| 57 | Secondary Neoplasm                         | 20197756                                                                                                    | 29800090; 29449540; 29901152;<br>27750112; 25205038; 25311085;<br>23483190; 22381352; 22878175;<br>23162804; 22292654; 21352421;<br>19820999; 19365673; 19194111;<br>19055112; 17101323; 16265347;<br>11839590; 11875708; 9696040;<br>8824556; 8968106; 7536040 |
| 58 | Secondary malignant neoplasm of bone       | 29435019                                                                                                    | 31667000; 28615627                                                                                                                                                                                                                                              |
| 59 | Malignant neoplasm of lung                 | 30683475; 30622322; 30446226;<br>26351076; 25486572; 19893592;<br>19564073; 2560625                         | 30885944; 27127879; 24732359                                                                                                                                                                                                                                    |
| 60 | Childhood Astrocytoma                      | 19267105; 8103050; 1906070                                                                                  | 25854377                                                                                                                                                                                                                                                        |
| 61 | Asthma                                     | 31461630; 30950247; 31849956;<br>29611236; 28192616; 28415826;<br>27622317; 27238549; 27695127;<br>20627922 | 30569582                                                                                                                                                                                                                                                        |
| 62 | Secondary malignant neoplasm of lymph node | 30672717; 23358428                                                                                          | 31467231; 30868407; 29383839;<br>30111999; 28457731; 24756855;<br>25217321; 25171474; 23580256;<br>21603862; 23162804; 21837681;<br>22200787; 21218086; 19820999;<br>18360353; 17032501; 16265347;<br>16097057; 15579771; 12887505                              |
| 63 | Non-Small Cell Lung Carcinoma              | 26431376; 23658645                                                                                          | 28197929; 27127879; 24215488;<br>22761930; 18620780; 8060323                                                                                                                                                                                                    |
| 64 | Complete atrioventricular block            | 22992810                                                                                                    | 28688902                                                                                                                                                                                                                                                        |
| 65 | Malignant neoplasm of stomach              | 22159640                                                                                                    | 30410586; 29342841; 26497012;<br>25511023; 25310523; 21618249;<br>19945782; 19820999; 12887505;<br>11106237                                                                                                                                                     |
| 66 | Esophageal carcinoma                       | 12168834                                                                                                    | 22408350; 22912541; 21889495                                                                                                                                                                                                                                    |
| 67 | Triple Negative Breast Neoplasms           | 31036052; 29750542; 29229854                                                                                | 28247948; 25667103                                                                                                                                                                                                                                              |
| 68 | Leukemia, Myelocytic, Acute                | 17047156                                                                                                    | 31611628; 30466095                                                                                                                                                                                                                                              |
| 69 | Adult Glioblastoma                         | 29557060; 28098415; 29159280;<br>27637889; 27194146; 26441059;                                              | 28807938                                                                                                                                                                                                                                                        |

|    |                                                    |                                                                                                                                                                                                                                                                                  |                                                                                                                                                                                                                                                                                  |
|----|----------------------------------------------------|----------------------------------------------------------------------------------------------------------------------------------------------------------------------------------------------------------------------------------------------------------------------------------|----------------------------------------------------------------------------------------------------------------------------------------------------------------------------------------------------------------------------------------------------------------------------------|
|    |                                                    | 25920530; 24526161; 19197327;<br>1998958                                                                                                                                                                                                                                         |                                                                                                                                                                                                                                                                                  |
| 70 | Neuroblastoma                                      | 27637889; 26887385; 28882441;<br>26943965; 25920530; 25086905;<br>18726131; 16115947                                                                                                                                                                                             | 28687621; 15852272; 11431772                                                                                                                                                                                                                                                     |
| 71 | Childhood<br>Neuroblastoma                         | 26887385; 28882441; 27637889;<br>26943965; 25920530; 25086905;<br>18726131                                                                                                                                                                                                       | 28687621; 15852272; 11431772                                                                                                                                                                                                                                                     |
| 72 | Squamous cell<br>carcinoma of the head<br>and neck | 25995245                                                                                                                                                                                                                                                                         | 31159419; 27793047; 24798676;<br>24037664                                                                                                                                                                                                                                        |
| 73 | Malignant neoplasm of<br>breast                    | 31167402; 26716512; 27077807;<br>25884794; 24141111; 18608205;<br>18608205                                                                                                                                                                                                       | 30450809; 31667000; 31709177;<br>29733962; 27927689; 28058579;<br>27098123; 26285644; 25311085;<br>23543443; 22740693; 23162804;<br>21195708; 19055112; 15956747;<br>15608682; 14632631; 12517790;<br>12756252; 11839590; 11875708;<br>10738249; 9570150                         |
| 74 | Hypertensive disease                               | 31798832                                                                                                                                                                                                                                                                         | 30031694; 16002749                                                                                                                                                                                                                                                               |
| 75 | Primary malignant<br>neoplasm                      | 30864696; 30613977; 31167402;<br>31348591; 30679806; 31036052;<br>30446226; 29750542; 29158470;<br>27637889; 29229854; 28214639;<br>28912136; 28129467; 26597133;<br>27077807; 26880763; 27496321;<br>27532609; 24141111; 23403306;<br>22522623; 22842821; 21226949;<br>22106296 | 30710284; 30868407; 31445888;<br>31623154; 30885944; 29556233;<br>30045697; 28935867; 28807938;<br>29069865; 28921916; 28247948;<br>28530639; 27793047; 27278086;<br>27098123; 27127879; 26497012;<br>25171474; 24798676; 24039846;<br>21911392; 21169409; 21195708              |
| 76 | Eosinophilic disorder                              | 29611236; 22981791                                                                                                                                                                                                                                                               | 30569582                                                                                                                                                                                                                                                                         |
| 77 | Anaplastic thyroid<br>carcinoma                    | 31512776                                                                                                                                                                                                                                                                         | 30196299; 27802204; 16265347                                                                                                                                                                                                                                                     |
| 78 | Childhood Leukemia                                 | 2295067                                                                                                                                                                                                                                                                          | 18452107                                                                                                                                                                                                                                                                         |
| 79 | Tumor Cell Invasion                                | 28317173; 25486572                                                                                                                                                                                                                                                               | 30893511; 30885944; 30710284;<br>30970087; 30152542; 30868407;<br>29400663; 29679610; 29383839;<br>30196299; 29282275; 28247948;<br>27922683; 29218245; 28209128;<br>27862098; 27927689; 28423501;<br>27802204; 27098123; 27348205;<br>27127879; 26928771; 26292668;<br>26744878 |
| 80 | Hepatitis B                                        | 31172579; 31201869 ;30930359;<br>29524530; 28373196; 28551415;<br>26315138; 25884105; 21721030;<br>18083266; 15994231; 8244255;<br>8340055                                                                                                                                       | 28688902; 20026004                                                                                                                                                                                                                                                               |
| 81 | Steatohepatitis                                    | 29855540                                                                                                                                                                                                                                                                         | 31321478                                                                                                                                                                                                                                                                         |

|    |                                           |                                                                                                                                                                                                                                                                                  |                                                                                                                                                                                                                                                                                  |
|----|-------------------------------------------|----------------------------------------------------------------------------------------------------------------------------------------------------------------------------------------------------------------------------------------------------------------------------------|----------------------------------------------------------------------------------------------------------------------------------------------------------------------------------------------------------------------------------------------------------------------------------|
| 82 | Tumor Angiogenesis                        | 22071966; 20379224; 11948141;<br>10029078                                                                                                                                                                                                                                        | 30450809; 23929008                                                                                                                                                                                                                                                               |
| 83 | Malignant neoplasm of colon and/or rectum | 23403306; 19564073                                                                                                                                                                                                                                                               | 31045759; 31581665; 28775774;<br>27750112; 25252758; 23783026;<br>21837681; 21354054; 21218086;<br>19513503; 16097057                                                                                                                                                            |
| 84 | Secondary malignant neoplasm of liver     | 28008721; 21958207; 14977858;<br>12405292; 11435460                                                                                                                                                                                                                              | 2287817; 5 21403839; 17786304;<br>12239456; 11875708                                                                                                                                                                                                                             |
| 85 | Skin lesion                               | 28752785; 29459858                                                                                                                                                                                                                                                               | 19703228                                                                                                                                                                                                                                                                         |
| 86 | Malignant neoplasm of endometrium         | 27532609; 21868529; 21226949                                                                                                                                                                                                                                                     | 29901152; 19506550                                                                                                                                                                                                                                                               |
| 87 | Primary malignant neoplasm of lung        | 30683475; 30622322; 30446226;<br>26351076; 25486572; 19893592;<br>19564073; 2560625                                                                                                                                                                                              | 30885944; 27127879; 24732359                                                                                                                                                                                                                                                     |
| 88 | Hepatitis B, Chronic                      | 9024450; 8340055                                                                                                                                                                                                                                                                 | 28688902                                                                                                                                                                                                                                                                         |
| 89 | Neoplasms                                 | 31512776; 31776268; 30683475;<br>31070806; 31627888; 30848981;<br>31036052; 30393160; 31358054;<br>31431457; 30675668; 30679806;<br>30622322; 29750542; 30012853;<br>29849115; 28912136; 28337378;<br>28514874; 27188205; 28578991;<br>28098415; 28483787; 27399807;<br>26880763 | 30745574; 31844158; 30868407;<br>31611961; 29741811; 30111999;<br>29212855; 29449540; 29400663;<br>30196299; 30097176; 30221056;<br>28807938; 28423501; 28832662;<br>28687621; 28808805; 28244731;<br>28058579; 27802204; 27750112;<br>25854377; 24469032; 25880590              |
| 90 | Solid Neoplasm                            | 9826714; 7776650; 2295067                                                                                                                                                                                                                                                        | 24037664; 19194111                                                                                                                                                                                                                                                               |
| 91 | Malignant tumor of cervix                 | 10521926                                                                                                                                                                                                                                                                         | 28921916                                                                                                                                                                                                                                                                         |
| 92 | Degenerative polyarthritis                | 23369825                                                                                                                                                                                                                                                                         | 17328050; 17105852; 16948116;<br>16948116                                                                                                                                                                                                                                        |
| 93 | Squamous cell carcinoma of esophagus      | 23639140; 21452064                                                                                                                                                                                                                                                               | 25217321; 24945657; 22458600;<br>22408350; 21603862                                                                                                                                                                                                                              |
| 94 | Tumor Progression                         | 31821828; 28849002                                                                                                                                                                                                                                                               | 31467231; 31474194; 30927479;<br>29497991; 30111999; 29578167;<br>29789685; 29204268; 29069865;<br>27750112; 27278086; 26928771;<br>25677816; 24469032; 24378831;<br>22262311; 21837681; 21360024;<br>20177948; 20019188; 18651563;<br>18781956; 15900299; 16367903;<br>16265347 |
| 95 | Eosinophilia                              | 29611236; 22981791                                                                                                                                                                                                                                                               | 30569582                                                                                                                                                                                                                                                                         |
| 96 | Nasopharyngeal carcinoma                  | 31312900; 31295651; 29581840                                                                                                                                                                                                                                                     | 26292668                                                                                                                                                                                                                                                                         |
| 97 | Adenocarcinoma of large intestine         | 27188205                                                                                                                                                                                                                                                                         | 12239456; 10952782                                                                                                                                                                                                                                                               |
| 98 | Central neuroblastoma                     | 27637889; 26887385; 28882441;<br>26943965; 25920530; 25086905;<br>18726131                                                                                                                                                                                                       | 28687621; 15852272; 11431772                                                                                                                                                                                                                                                     |



|     |                                                |                                           |                                                                                                                                                                                                                |
|-----|------------------------------------------------|-------------------------------------------|----------------------------------------------------------------------------------------------------------------------------------------------------------------------------------------------------------------|
| 99  | Carcinoma                                      | 22555508                                  | 27862098; 19194111; 19365673;<br>11786397; 11875708; 10738249;<br>9881667; 9072554; 9815629                                                                                                                    |
| 100 | Conventional (Clear Cell) Renal Cell Carcinoma | 22344395; 18695887; 15546502;<br>12631618 | 22613408; 19365673                                                                                                                                                                                             |
| 101 | Pancreatic Neoplasm                            | 20230221                                  | 25677816; 19653048; 18350635;<br>17638890; 16865243                                                                                                                                                            |
| 102 | Colorectal Carcinoma                           | 23403306; 19564073                        | 31581665; 31045759; 30221056;<br>29544454; 29383839; 28775774;<br>28209128; 27053631; 28423501;<br>27750112; 24936148; 25252758;<br>23783026; 21837681; 20191297;<br>21354054; 21218086; 19513503;<br>16097057 |
| 103 | Hepatitis                                      | 30594597; 22106296                        | 31321478; 28688902                                                                                                                                                                                             |
| 104 | Cardiomyopathy, Familial Idiopathic            | 20350703                                  | 19653048                                                                                                                                                                                                       |

**Table S5.** List of the human diseases associated with IFN- $\beta$  and S100A4 protein, according to Open Targets Platform database (<https://www.opentargets.org>), and corresponding association scores (<https://docs.targetvalidation.org/getting-started/scoring>). Diseases with association scores for the both proteins exceeding 0.1 are highlighted in yellow.

| <i>Nº</i> | <i>Disease</i>                      | <i>IFN-<math>\beta</math></i> | <i>S100A4</i> |
|-----------|-------------------------------------|-------------------------------|---------------|
| 1         | B-cell non-Hodgkins lymphoma        | 0.063                         | 0.014         |
| 2         | chronic hepatitis B virus infection | 0.055                         | 0.014         |
| 3         | liver neoplasm                      | 0.113                         | 0.1           |
| 4         | shock                               | 0.044                         | 0.039         |
| 5         | hepatitis                           | 0.057                         | 0.029         |
| 6         | ulcerative colitis                  | 0.05                          | 0.014         |
| 7         | acute myeloid leukemia              | 0.035                         | 0.062         |
| 8         | inflammatory bowel disease          | 0.119                         | 0.074         |
| 9         | obesity                             | 0.198                         | 0.081         |
| 10        | pancreatic carcinoma                | 0.047                         | 0.066         |
| 11        | Ewing sarcoma                       | 0.045                         | 0.193         |
| 12        | proteinuria                         | 0.072                         | 0.013         |
| 13        | medulloblastoma                     | 0.042                         | 0.036         |
| 14        | cardiac hypertrophy                 | 0.011                         | 0.027         |
| 15        | lymphangioliomyomatosis             | 0.053                         | 0.01          |
| 16        | weight loss                         | 0.022                         | 0.014         |
| 17        | lung neoplasm                       | 0.647                         | 0.164         |
| 18        | immunophenotype                     | 0.03                          | 0.015         |
| 19        | colitis                             | 0.119                         | 0.068         |
| 20        | adenocarcinoma                      | 0.783                         | 0.142         |
| 21        | renal cell adenocarcinoma           | 0.078                         | 0.084         |
| 22        | epilepsy                            | 0.288                         | 0.028         |
| 23        | hyperplasia                         | 0.051                         | 0.026         |
| 24        | dysplasia                           | 0.029                         | 0.046         |
| 25        | necrotizing enterocolitis           | 0.049                         | 0.01          |
| 26        | metastatic melanoma                 | 0.05                          | 0.012         |
| 27        | embryonic lethality                 | 0.011                         | 0.013         |
| 28        | lung cancer                         | 0.647                         | 0.164         |
| 29        | fibrosarcoma                        | 0.052                         | 0.009         |
| 30        | triple-negative breast cancer       | 0.039                         | 0.033         |
| 31        | cutaneous melanoma                  | 0.038                         | 0.038         |
| 32        | dilatation                          | 0.01                          | 0.019         |
| 33        | lymph node metastatic carcinoma     | 0.029                         | 0.066         |
| 34        | systemic scleroderma                | 0.019                         | 0.072         |

|    |                                   |       |       |
|----|-----------------------------------|-------|-------|
| 35 | pulmonary fibrosis                | 0.033 | 0.103 |
| 36 | acute promyelocytic leukemia      | 0.012 | 0.011 |
| 37 | non-alcoholic fatty liver disease | 0.019 | 0.035 |
| 38 | cervical cancer                   | 0.047 | 0.05  |
| 39 | colorectal adenocarcinoma         | 0.045 | 0.064 |
| 40 | infectious disease                | 0.295 | 0.219 |
| 41 | fever                             | 0.065 | 0.045 |
| 42 | asthma                            | 0.095 | 0.074 |
| 43 | breast neoplasm                   | 0.716 | 0.242 |
| 44 | gastric adenocarcinoma            | 0.026 | 0.033 |
| 45 | nervousness                       | 0.066 | 0.035 |
| 46 | increased inflammatory response   | 0.057 | 0.073 |
| 47 | mucous membrane pemphigoid        | 0.041 | 0.07  |
| 48 | viral disease                     | 0.222 | 0.044 |
| 49 | central nervous system cancer     | 0.68  | 0.124 |
| 50 | calcinosis                        | 0.027 | 0.01  |
| 51 | hepatic fibrosis                  | 0.042 | 0.01  |
| 52 | cystic fibrosis                   | 0.027 | 0.015 |
| 53 | nervous system injury             | 0.059 | 0.061 |
| 54 | Duchenne muscular dystrophy       | 0.033 | 0.048 |
| 55 | cervical carcinoma                | 0.033 | 0.016 |
| 56 | refractory drug response          | 0.025 | 0.041 |
| 57 | stomach neoplasm                  | 0.064 | 0.103 |
| 58 | atherosclerosis                   | 0.052 | 0.01  |
| 59 | nicotine dependence               | 0.06  | 0.018 |
| 60 | primitive neuroectodermal tumor   | 0.083 | 0.063 |
| 61 | arthritis                         | 0.13  | 0.09  |
| 62 | neurodegeneration                 | 0.048 | 0.016 |
| 63 | arterial disorder                 | 0.104 | 0.078 |
| 64 | immune system disease             | 0.36  | 0.106 |
| 65 | pulmonary arterial hypertension   | 0.102 | 0.076 |
| 66 | idiopathic pulmonary fibrosis     | 0.031 | 0.1   |
| 67 | osteoarthritis                    | 0.043 | 0.049 |
| 68 | eosinophilia                      | 0.031 | 0.014 |
| 69 | systemic lupus erythematosus      | 0.063 | 0.027 |
| 70 | breast cancer                     | 0.716 | 0.242 |
| 71 | anaplastic astrocytoma            | 0.045 | 0.011 |
| 72 | diabetes mellitus                 | 0.05  | 0.03  |
| 73 | leukemia                          | 0.067 | 0.067 |

|     |                                                       |       |       |
|-----|-------------------------------------------------------|-------|-------|
| 74  | non-alcoholic steatohepatitis                         | 0.016 | 0.01  |
| 75  | anxiety disorder                                      | 0.029 | 0.011 |
| 76  | urinary bladder cancer                                | 0.06  | 0.074 |
| 77  | polymyositis                                          | 0.072 | 0.024 |
| 78  | non-small cell lung carcinoma                         | 0.646 | 0.159 |
| 79  | spinal cord injury                                    | 0.052 | 0.051 |
| 80  | liposarcoma                                           | 0.01  | 0.032 |
| 81  | retinopathy                                           | 0.31  | 0.048 |
| 82  | liver disease                                         | 0.115 | 0.107 |
| 83  | breast adenocarcinoma                                 | 0.029 | 0.047 |
| 84  | head and neck malignant neoplasia                     | 0.078 | 0.086 |
| 85  | neuropathy                                            | 0.347 | 0.206 |
| 86  | prostate carcinoma                                    | 0.073 | 0.129 |
| 87  | neoplasm                                              | 0.85  | 0.351 |
| 88  | colon adenocarcinoma                                  | 0.016 | 0.049 |
| 89  | injury                                                | 0.075 | 0.078 |
| 90  | panniculitis                                          | 0.043 | 0.012 |
| 91  | skin neoplasm                                         | 0.141 | 0.261 |
| 92  | fatty liver disease                                   | 0.02  | 0.046 |
| 93  | peripheral demyelination                              | 0.06  | 0.014 |
| 94  | sepsis                                                | 0.155 | 0.012 |
| 95  | psoriasis                                             | 0.056 | 0.059 |
| 96  | lung disease                                          | 0.65  | 0.166 |
| 97  | hepatoerythropoietic porphyria                        | 0.017 | 0.087 |
| 98  | pancreatic ductal adenocarcinoma                      | 0.011 | 0.053 |
| 99  | esophageal carcinoma                                  | 0.529 | 0.086 |
| 100 | amyloidosis                                           | 0.013 | 0.037 |
| 101 | endometrial carcinoma                                 | 0.061 | 0.089 |
| 102 | extrophy-epispadias complex                           | 0.019 | 0.014 |
| 103 | adrenal cortex carcinoma                              | 0.029 | 0.003 |
| 104 | thyroid gland undifferentiated (anaplastic) carcinoma | 0.013 | 0.048 |
| 105 | hypoxia                                               | 0.046 | 0.083 |
| 106 | Kaposi's sarcoma                                      | 0.05  | 0.193 |
| 107 | keloid                                                | 0.011 | 0.042 |
| 108 | hemangioma                                            | 0.046 | 0.017 |
| 109 | head and neck squamous cell carcinoma                 | 0.053 | 0.071 |
| 110 | dermatomyositis                                       | 0.071 | 0.021 |
| 111 | basal cell carcinoma                                  | 0.024 | 0.027 |
| 112 | rheumatoid arthritis                                  | 0.063 | 0.092 |

|     |                                           |       |       |
|-----|-------------------------------------------|-------|-------|
| 113 | osteosarcoma                              | 0.044 | 0.093 |
| 114 | Crohn's disease                           | 0.037 | 0.038 |
| 115 | renal carcinoma                           | 0.199 | 0.086 |
| 116 | glomerulonephritis (disease)              | 0.048 | 0.016 |
| 117 | squamous cell carcinoma                   | 0.055 | 0.088 |
| 118 | nervous system disease                    | 0.85  | 0.273 |
| 119 | fibrosis                                  | 0.063 | 0.11  |
| 120 | intraepithelial neoplasia                 | 0.013 | 0.019 |
| 121 | Neu-Laxova syndrome                       | 0.02  | 0.014 |
| 122 | complication                              | 0.078 | 0.014 |
| 123 | clear cell renal carcinoma                | 0.024 | 0.041 |
| 124 | HIV infection                             | 0.058 | 0.004 |
| 125 | heart disease                             | 0.283 | 0.083 |
| 126 | carcinoma                                 | 0.839 | 0.264 |
| 127 | bladder transitional cell carcinoma       | 0.018 | 0.017 |
| 128 | melanoma                                  | 0.141 | 0.082 |
| 129 | chronic obstructive pulmonary disease     | 0.087 | 0.071 |
| 130 | lymphoma                                  | 0.067 | 0.023 |
| 131 | carcinoma, Lewis lung                     | 0.029 | 0.035 |
| 132 | lung carcinoma                            | 0.646 | 0.164 |
| 133 | osteopenia                                | 0.012 | 0.029 |
| 134 | glioma                                    | 0.788 | 0.13  |
| 135 | substance dependence                      | 0.062 | 0.02  |
| 136 | type II hypersensitivity reaction disease | 0.261 | 0.095 |
| 137 | kidney neoplasm                           | 0.199 | 0.088 |
| 138 | prostate adenocarcinoma                   | 0.072 | 0.129 |
| 139 | osteoporosis                              | 0.05  | 0.073 |
| 140 | ovarian carcinoma                         | 0.697 | 0.138 |
| 141 | vascular disease                          | 0.228 | 0.212 |
| 142 | tuberculosis                              | 0.149 | 0.035 |
| 143 | severe cutaneous adverse reaction         | 0.05  | 0.046 |
| 144 | toxic encephalopathy                      | 0.025 | 0.011 |
| 145 | neuroblastoma                             | 0.082 | 0.059 |
| 146 | urethral intrinsic sphincter deficiency   | 0.043 | 0.069 |
| 147 | inflammation                              | 0.102 | 0.068 |
| 148 | Alzheimer's disease                       | 0.044 | 0.004 |
| 149 | metastatic neoplasm                       | 0.05  | 0.045 |
| 150 | esophageal squamous cell carcinoma        | 0.04  | 0.085 |
| 151 | amyotrophic lateral sclerosis             | 0.036 | 0.068 |

|     |                                           |       |       |
|-----|-------------------------------------------|-------|-------|
| 152 | invasive breast ductal carcinoma          | 0.009 | 0.046 |
| 153 | brain neoplasm                            | 0.788 | 0.132 |
| 154 | pancreatitis                              | 0.031 | 0.029 |
| 155 | malignant mesothelioma                    | 0.044 | 0.029 |
| 156 | chronic myelogenous leukemia              | 0.04  | 0.008 |
| 157 | myeloid leukemia                          | 0.043 | 0.062 |
| 158 | colorectal carcinoma                      | 0.063 | 0.208 |
| 159 | lung adenocarcinoma                       | 0.642 | 0.012 |
| 160 | brain injury                              | 0.045 | 0.032 |
| 161 | pleural tuberculosis                      | 0.015 | 0.031 |
| 162 | gastric carcinoma                         | 0.042 | 0.085 |
| 163 | cancer                                    | 0.839 | 0.346 |
| 164 | ascites                                   | 0.051 | 0.006 |
| 165 | experimental autoimmune encephalomyelitis | 0.105 | 0.036 |
| 166 | hepatocellular carcinoma                  | 0.112 | 0.097 |
| 167 | necrosis                                  | 0.064 | 0.019 |
| 168 | infectious mononucleosis                  | 0.087 | 0.012 |
| 169 | heart failure                             | 0.015 | 0.017 |
| 170 | relapsing-remitting multiple sclerosis    | 0.11  | 0.006 |
| 171 | hepatitis B virus infection               | 0.064 | 0.038 |
| 172 | colon carcinoma                           | 0.06  | 0.087 |
| 173 | non-small cell lung adenocarcinoma        | 0.02  | 0.055 |
| 174 | malignant pancreatic neoplasm             | 0.058 | 0.208 |
| 175 | oral mucositis                            | 0.058 | 0.012 |
| 176 | oral squamous cell carcinoma              | 0.01  | 0.053 |
| 177 | vulvar intraepithelial neoplasia          | 0.038 | 0.008 |
| 178 | myocardial infarction                     | 0.024 | 0.047 |
| 179 | cholangiocarcinoma                        | 0.01  | 0.074 |
| 180 | allergy                                   | 0.04  | 0.043 |
| 181 | astrocytoma                               | 0.676 | 0.123 |
| 182 | nasopharyngeal squamous cell carcinoma    | 0.047 | 0.028 |
| 183 | pneumonia                                 | 0.06  | 0.101 |
| 184 | periodontitis                             | 0.013 | 0.057 |
| 185 | ovarian neoplasm                          | 0.697 | 0.13  |
| 186 | myositis                                  | 0.076 | 0.086 |
| 187 | childhood acute myeloid leukemia          | 0.013 | 0.028 |
| 188 | tongue neoplasm                           | 0.043 | 0.016 |
| 189 | cirrhosis of liver                        | 0.061 | 0.071 |
| 190 | invasive carcinoma                        | 0.013 | 0.053 |

|     |                               |       |       |
|-----|-------------------------------|-------|-------|
| 191 | congenital heart disease      | 0.013 | 0.013 |
| 192 | undifferentiated carcinoma    | 0.048 | 0.05  |
| 193 | pancreatic adenocarcinoma     | 0.047 | 0.045 |
| 194 | sarcoidosis                   | 0.081 | 0.02  |
| 195 | glioblastoma multiforme       | 0.676 | 0.123 |
| 196 | neurodegenerative disease     | 0.358 | 0.076 |
| 197 | breast carcinoma              | 0.709 | 0.197 |
| 198 | Southeast Asian ovalocytosis  | 0.011 | 0.01  |
| 199 | Becker muscular dystrophy     | 0.01  | 0.027 |
| 200 | lupus nephritis               | 0.032 | 0.006 |
| 201 | myocarditis                   | 0.049 | 0.025 |
| 202 | X-linked adrenoleukodystrophy | 0.046 | 0.023 |

**Table S6.** List of the human diseases associated with IFN- $\beta$  and S100A6 protein, according to DisGeNET database (<http://www.disgenet.org>). PubMed identifiers of the references confirming the protein-disease associations are indicated.

| <i>Nº</i> | <i>Disease</i>                                 | <i>IFN-<math>\beta</math></i>                                                                                                                                                                                                                  | <i>S100A6</i>                                                                  |
|-----------|------------------------------------------------|------------------------------------------------------------------------------------------------------------------------------------------------------------------------------------------------------------------------------------------------|--------------------------------------------------------------------------------|
| 1         | Primary malignant neoplasm                     | 30864696; 30613977; 31167402; 30679806; 31036052; 30446226; 29750542; 29158470; 27637889; 29229854; 28214639; 28912136; 28129467; 26597133; 27077807; 26880763; 27496321; 27532609; 24141111; 23403306; 22522623; 22842821; 21226949; 22106296 | 29552203; 28123545; 25120023; 19888321; 18714402; 17970874; 15280928; 10952782 |
| 2         | Coronary Arteriosclerosis                      | 25882064                                                                                                                                                                                                                                       | 28174168                                                                       |
| 3         | Conventional (Clear Cell) Renal Cell Carcinoma | 22344395; 18695887; 15546502; 12631618                                                                                                                                                                                                         | 25120023; 25760073                                                             |
| 4         | Leukemia, Myelocytic, Acute                    | 17047156                                                                                                                                                                                                                                       | 2542700                                                                        |
| 5         | Malignant neoplasm of stomach                  | 22159640                                                                                                                                                                                                                                       | 24705642; 22681645; 20581057; 17970874                                         |
| 6         | Malignant neoplasm of liver                    | 28008721                                                                                                                                                                                                                                       | 24281831                                                                       |
| 7         | Acute lymphocytic leukemia                     | 9922477; 2294436                                                                                                                                                                                                                               | 28646023; 22025528                                                             |
| 8         | Liver carcinoma                                | 28456632; 23887606; 22790964; 19911974; 18618506; 12395321                                                                                                                                                                                     | 24281831; 19048101                                                             |
| 9         | Malignant neoplasm of ovary                    | 11896621                                                                                                                                                                                                                                       | 19888321                                                                       |
| 10        | Glioblastoma                                   | 29557060; 27637889; 28098415; 29159280; 28912136; 27194146; 25920530; 26441059; 26397698; 24526161; 23384727; 21805051; 20606645; 19197327; 15455376; 14965379; 1501894; 1998958; 1653364                                                      | 19074870                                                                       |
| 11        | Bladder Neoplasm                               | 11948141; 2297754                                                                                                                                                                                                                              | 26508026                                                                       |



|    |                                                |                                                                                                                      |                    |
|----|------------------------------------------------|----------------------------------------------------------------------------------------------------------------------|--------------------|
| 12 | Childhood Acute Lymphoblastic Leukemia         | 9922477                                                                                                              | 22025528           |
| 13 | Adenocarcinoma of large intestine              | 27188205                                                                                                             | 12239456; 10952782 |
| 14 | Secondary malignant neoplasm of lymph node     | 30672717; 23358428                                                                                                   | 24705642           |
| 15 | Colon Carcinoma                                | 29496994; 18035482; 1586975                                                                                          | 29534068           |
| 16 | Malignant tumor of colon                       | 29496994; 18035482                                                                                                   | 29534068           |
| 17 | Liver and Intrahepatic Biliary Tract Carcinoma | 28008721                                                                                                             | 24281831           |
| 18 | Malignant neoplasm of prostate                 | 29435019; 26339361; 25075566; 23790156; 22429371; 17088978; 16989575; 12231540; 11498771                             | 16015609; 15280928 |
| 19 | Neuroblastoma                                  | 27637889; 26887385; 28882441; 26943965; 25920530; 25086905; 18726131; 16115947                                       | 7576953; 1998963   |
| 20 | Central neuroblastoma                          | 27637889; 26887385; 28882441; 26943965; 25920530; 25086905; 18726131                                                 | 7576953; 1998963   |
| 21 | Precursor Cell Lymphoblastic Leukemia Lymphoma | 2294436                                                                                                              | 28646023           |
| 22 | Hepatitis B                                    | 31172579; 31201869; 30930359; 29524530; 28551415; 26315138; 25884105; 21721030; 18083266; 15994231; 8244255; 8340055 | 20026004           |
| 23 | Non-Small Cell Lung Carcinoma                  | 30622322; 26431376                                                                                                   | 18620780           |
| 25 | Malignant neoplasm of urinary bladder          | 11948141; 2297754                                                                                                    | 26508026           |

|    |                                       |                                                                                                                                                                                                                                                                     |                                                                                                                             |
|----|---------------------------------------|---------------------------------------------------------------------------------------------------------------------------------------------------------------------------------------------------------------------------------------------------------------------|-----------------------------------------------------------------------------------------------------------------------------|
| 24 | Secondary Neoplasm                    | 20197756                                                                                                                                                                                                                                                            | 25120023;<br>26252518;23007696;<br>16015609; 9291441; 8261423                                                               |
| 25 | Alzheimer's Disease                   | 30610591; 31152860 ;31233762;<br>30076830; 30222725; 24262201                                                                                                                                                                                                       | 31440382; 15590066                                                                                                          |
| 26 | Pancreatic Neoplasm                   | 20230221                                                                                                                                                                                                                                                            | 16278400; 12750293                                                                                                          |
| 27 | Adult Medulloblastoma                 | 28559152; 24584142                                                                                                                                                                                                                                                  | 17579622                                                                                                                    |
| 28 | Carcinoma of lung                     | 30622322; 31428903; 30683475;<br>30446226; 26351076; 25486572;<br>19893592;19564073; 2560625                                                                                                                                                                        | 31497188; 18620780                                                                                                          |
| 29 | Meningioma                            | 27873050                                                                                                                                                                                                                                                            | 15492810                                                                                                                    |
| 30 | Carcinoma of bladder                  | 11948141                                                                                                                                                                                                                                                            | 26508026                                                                                                                    |
| 31 | Malignant neoplasm of breast          | 31167402; 26716512; 27077807;<br>25884794; 24141111; 18608205;<br>18608205                                                                                                                                                                                          | 28051137; 22997041                                                                                                          |
| 32 | Secondary malignant neoplasm of liver | 28008721; 21958207; 14977858;<br>12405292; 11435460                                                                                                                                                                                                                 | 12239456;10952782                                                                                                           |
| 33 | Childhood Medulloblastoma             | 28559152; 24584142                                                                                                                                                                                                                                                  | 17579622; 17579622                                                                                                          |
| 34 | Malignant Neoplasms                   | 30864696; 30679806; 31036052;<br>31167402 ;30613977; 30446226;<br>29158470; 29750542; 28214639;<br>26597133; 29229854; 28912136;<br>28129467; 27637889; 27532609;<br>26880763; 27496321; 27077807;<br>24141111; 23403306; 22522623;<br>22842821; 22106296; 21226949 | 29544367; 29552203;<br>28075439; 28123545;<br>25120023; 24281831;<br>19888321; 18714402;<br>17970874; 15280928;<br>10952782 |
| 35 | Medulloblastoma                       | 28559152; 24584142                                                                                                                                                                                                                                                  | 17579622; 17579622                                                                                                          |
| 36 | Adult Acute Lymphocytic Leukemia      | 9922477                                                                                                                                                                                                                                                             | 22025528                                                                                                                    |
| 37 | Amyloidosis                           | 30222725                                                                                                                                                                                                                                                            | 31440382                                                                                                                    |
| 38 | Myeloid Leukemia, Chronic             | 30078654; 7544849                                                                                                                                                                                                                                                   | 2542700                                                                                                                     |
| 39 | Pancreatic carcinoma                  | 23807450                                                                                                                                                                                                                                                            | 26044826; 25799022                                                                                                          |

|    |                                    |                                                                                                                                                                                                                                                |                                                                                                                                                   |
|----|------------------------------------|------------------------------------------------------------------------------------------------------------------------------------------------------------------------------------------------------------------------------------------------|---------------------------------------------------------------------------------------------------------------------------------------------------|
| 40 | Colorectal Carcinoma               | 23403306; 19564073                                                                                                                                                                                                                             | 24378749                                                                                                                                          |
| 41 | Glioblastoma Multiforme            | 29557060; 29159280; 28912136; 28098415; 27637889 ;27194146; 25920530; 26441059; 24526161; 23384727; 20606645; 19197327; 18714312; 14965379; 1653364; 1998958                                                                                   | 19074870                                                                                                                                          |
| 42 | Prostate carcinoma                 | 29435019; 26339361; 25075566; 23790156; 22429371; 16989575; 17088978; 12231540; 11498771                                                                                                                                                       | 16015609; 15280928                                                                                                                                |
| 43 | Tuberculosis                       | 29255077; 29504148; 29017282 28422568; 29258190                                                                                                                                                                                                | 27882322; 19912616 11574597                                                                                                                       |
| 44 | Primary malignant neoplasm of lung | 30683475; 30622322; 30446226; 26351076; 25486572; 19893592; 19564073; 2560625                                                                                                                                                                  | 31497188; 18620780                                                                                                                                |
| 45 | Melanoma                           | 30864696; 30213181; 31070806; 28649738; 27677689; 28624449; 28877249; 29136453; 27399807; 26102027; 26054674; 25728676; 23370279; 23358428; 23018621; 22555508; 21723255; 21846298; 21493591; 18945721; 16505900; 16928243; 16343929; 12096926 | 28433799; 9925766; 9716033 9291441; 7654229; 8261423; 1737392                                                                                     |
| 46 | Neoplasms, Experimental            | 2297754                                                                                                                                                                                                                                        | 19888321                                                                                                                                          |
| 47 | Malignant neoplasm of lung         | 30683475; 30622322; 30446226; 26351076; 25486572; 19893592; 19564073; 2560625                                                                                                                                                                  | 31497188; 18620780                                                                                                                                |
| 48 | Fibrosis, Liver                    | 25715168                                                                                                                                                                                                                                       | 29800549                                                                                                                                          |
| 49 | Neoplasm Metastasis                | 31070806; 30213181; 29202279; 28129467; 26716512; 26102027; 20197756; 12405292; 11948141; 11498771; 10029078; 9815626;                                                                                                                         | 25120023; 26252518; 24705642; 24281831; 23007696; 22681645; 20581057; 18612712; 16015609; 16157226; 12239456; 10952782; 9291441; 7654229; 8261423 |
| 50 | Childhood Neuroblastoma            | 26887385; 28882441; 27637889; 26943965; 25920530; 25086905; 18726131                                                                                                                                                                           | 7576953; 1998963                                                                                                                                  |

|    |                                |                                                                                                                                                                                                                                                                                  |                                                                                                                                                                                                          |
|----|--------------------------------|----------------------------------------------------------------------------------------------------------------------------------------------------------------------------------------------------------------------------------------------------------------------------------|----------------------------------------------------------------------------------------------------------------------------------------------------------------------------------------------------------|
| 51 | Adult Liver Carcinoma          | 28008721                                                                                                                                                                                                                                                                         | 24281831                                                                                                                                                                                                 |
| 52 | Tumor Cell Invasion            | 29618645; 28317173; 25486572                                                                                                                                                                                                                                                     | 29544367;<br>29629840;25799022;<br>25120023; 24705642;<br>10952782                                                                                                                                       |
| 53 | Nasopharyngeal carcinoma       | 31312900; 31295651; 29581840                                                                                                                                                                                                                                                     | 27596819                                                                                                                                                                                                 |
| 54 | Neoplasms                      | 31512776; 31776268 ;30683475;<br>31070806; 31627888; 30848981;<br>31036052; 30393160; 31358054;<br>31431457; 30675668; 30679806;<br>30622322; 29750542; 30012853;<br>29849115; 28912136; 28337378;<br>28514874; 27188205; 28578991;<br>28098415; 28483787; 27399807;<br>26880763 | 31497188; 29629840;<br>28075439; 28612211;<br>25760073; 25120023;<br>26252518; 24281831;<br>24705642; 24583627;<br>24217649; 22681645;<br>19888321; 18620780;<br>16464796; 12859951;<br>9291441; 7654229 |
| 55 | Malignant neoplasm of pancreas | 23807450                                                                                                                                                                                                                                                                         | 25799022                                                                                                                                                                                                 |
| 56 | Tumor Progression              | 31821828; 28849002                                                                                                                                                                                                                                                               | 22681645; 8261423                                                                                                                                                                                        |
| 57 | Stomach Carcinoma              | 22159640                                                                                                                                                                                                                                                                         | 26044826; 24705642;<br>22681645; 20581057;<br>17970874                                                                                                                                                   |
| 58 | Breast Carcinoma               | 31167402; 27207649; 27077807;<br>26716512; 25884794; 24141111;<br>18608205 ;18608205; 9059994                                                                                                                                                                                    | 28051137; 22997041;<br>9716033                                                                                                                                                                           |

**Table S7.** List of the human diseases associated with IFN- $\beta$  and S100A6 protein, according to Open Targets Platform database (<https://www.opentargets.org>), and corresponding association scores (<https://docs.targetvalidation.org/getting-started/scoring>). Diseases with association scores for the both proteins exceeding 0.1 are highlighted in yellow.

| <i>Nº</i> | <i>Disease</i>                     | <i>IFN-<math>\beta</math></i> | <i>S100A6</i> |
|-----------|------------------------------------|-------------------------------|---------------|
| 1         | breast adenocarcinoma              | 0.029                         | 0.049         |
| 2         | legionnaires' disease              | 0.039                         | 0.01          |
| 3         | complication                       | 0.078                         | 0.01          |
| 4         | Duchenne muscular dystrophy        | 0.033                         | 0.035         |
| 5         | allergy                            | 0.04                          | 0.011         |
| 6         | multiple myeloma                   | 0.037                         | 0.034         |
| 7         | nervous system disease             | 0.85                          | 0.15          |
| 8         | hyperglycemia                      | 0.012                         | 0.011         |
| 9         | epilepsy                           | 0.288                         | 0.044         |
| 10        | heart failure                      | 0.015                         | 0.034         |
| 11        | pulmonary arterial hypertension    | 0.102                         | 0.013         |
| 12        | cognitive disorder                 | 0.284                         | 0.031         |
| 13        | stomach neoplasm                   | 0.064                         | 0.091         |
| 14        | cervical cancer                    | 0.047                         | 0.05          |
| 15        | severe cutaneous adverse reaction  | 0.05                          | 0.013         |
| 16        | pancreatic ductal adenocarcinoma   | 0.011                         | 0.058         |
| 17        | cirrhosis of liver                 | 0.061                         | 0.043         |
| 18        | Alzheimer's disease                | 0.044                         | 0.03          |
| 19        | lung neoplasm                      | 0.647                         | 0.102         |
| 20        | lymph node metastatic carcinoma    | 0.029                         | 0.035         |
| 21        | squamous cell carcinoma            | 0.055                         | 0.048         |
| 22        | non-small cell lung carcinoma      | 0.646                         | 0.097         |
| 23        | prostate intraepithelial neoplasia | 0.01                          | 0.027         |
| 24        | potassium-aggravated myotonia      | 0.044                         | 0.02          |
| 25        | pleural effusion                   | 0.042                         | 0.022         |
| 26        | diabetes mellitus                  | 0.05                          | 0.016         |
| 27        | nervousness                        | 0.066                         | 0.038         |
| 28        | lung carcinoma                     | 0.646                         | 0.101         |
| 29        | melanoma                           | 0.141                         | 0.073         |
| 30        | idiopathic pulmonary fibrosis      | 0.031                         | 0.01          |
| 31        | carcinoma                          | 0.839                         | 0.115         |
| 32        | cancer                             | 0.839                         | 0.116         |
| 33        | ovarian neoplasm                   | 0.697                         | 0.067         |
| 34        | osteosarcoma                       | 0.044                         | 0.08          |

|    |                                        |       |       |
|----|----------------------------------------|-------|-------|
| 35 | glioblastoma multiforme                | 0.676 | 0.038 |
| 36 | Friedreich ataxia                      | 0.011 | 0.005 |
| 37 | hypothyroidism                         | 0.139 | 0.011 |
| 38 | edema                                  | 0.023 | 0.014 |
| 39 | systemic scleroderma                   | 0.019 | 0.03  |
| 40 | dilated cardiomyopathy                 | 0.257 | 0.029 |
| 41 | colon carcinoma                        | 0.06  | 0.035 |
| 42 | meningioma                             | 0.041 | 0.037 |
| 43 | clear cell renal carcinoma             | 0.024 | 0.036 |
| 44 | colorectal adenocarcinoma              | 0.045 | 0.061 |
| 45 | pain                                   | 0.044 | 0.01  |
| 46 | ischemia reperfusion injury            | 0.023 | 0.027 |
| 47 | nicotine dependence                    | 0.06  | 0.004 |
| 48 | ischemia                               | 0.053 | 0.018 |
| 49 | sepsis                                 | 0.155 | 0.037 |
| 50 | adrenal cortex carcinoma               | 0.029 | 0.007 |
| 51 | small cell lung carcinoma              | 0.033 | 0.017 |
| 52 | leukemia                               | 0.067 | 0.065 |
| 53 | intraepithelial neoplasia              | 0.013 | 0.032 |
| 54 | invasive breast ductal carcinoma       | 0.009 | 0.027 |
| 55 | chronic bronchitis                     | 0.01  | 0.019 |
| 56 | lung disease                           | 0.65  | 0.103 |
| 57 | bladder tumor                          | 0.061 | 0.035 |
| 58 | astrocytoma                            | 0.676 | 0.025 |
| 59 | exhaustion                             | 0.016 | 0.011 |
| 60 | nasopharyngeal squamous cell carcinoma | 0.047 | 0.035 |
| 61 | urinary system disease                 | 0.774 | 0.084 |
| 62 | immunophenotype                        | 0.03  | 0.02  |
| 63 | cutaneous melanoma                     | 0.038 | 0.036 |
| 64 | uveal melanoma                         | 0.037 | 0.02  |
| 65 | neurodegenerative disease              | 0.358 | 0.044 |
| 66 | infectious disease                     | 0.295 | 0.033 |
| 67 | prostate adenocarcinoma                | 0.072 | 0.066 |
| 68 | proteinuria                            | 0.072 | 0.015 |
| 69 | endometrial carcinoma                  | 0.061 | 0.038 |
| 70 | basal cell carcinoma                   | 0.024 | 0.024 |
| 71 | fibrosis                               | 0.063 | 0.054 |
| 72 | cholangiocarcinoma                     | 0.01  | 0.074 |
| 73 | hepatoblastoma                         | 0.015 | 0.033 |

|     |                                       |       |       |
|-----|---------------------------------------|-------|-------|
| 74  | pulmonary fibrosis                    | 0.033 | 0.027 |
| 75  | mental deterioration                  | 0.019 | 0.012 |
| 76  | non-small cell lung adenocarcinoma    | 0.02  | 0.02  |
| 77  | bronchoalveolar adenocarcinoma        | 0.012 | 0.026 |
| 78  | colorectal carcinoma                  | 0.063 | 0.094 |
| 79  | tuberculosis                          | 0.149 | 0.01  |
| 80  | infertility                           | 0.203 | 0.021 |
| 81  | chronic obstructive pulmonary disease | 0.087 | 0.04  |
| 82  | hepatoerythropoietic porphyria        | 0.017 | 0.014 |
| 83  | bronchioloalveolar carcinoma          | 0.058 | 0.014 |
| 84  | leiomyosarcoma                        | 0.014 | 0.016 |
| 85  | obesity                               | 0.198 | 0.01  |
| 86  | injury                                | 0.075 | 0.06  |
| 87  | shock                                 | 0.044 | 0.061 |
| 88  | pancreatic carcinoma                  | 0.047 | 0.037 |
| 89  | Southeast Asian ovalocytosis          | 0.011 | 0.01  |
| 90  | dysplasia                             | 0.029 | 0.016 |
| 91  | fatigue                               | 0.066 | 0.013 |
| 92  | lung cancer                           | 0.647 | 0.102 |
| 93  | adenocarcinoma                        | 0.783 | 0.098 |
| 94  | hyperplasia                           | 0.051 | 0.027 |
| 95  | renal cell adenocarcinoma             | 0.078 | 0.037 |
| 96  | vasculitis                            | 0.043 | 0.01  |
| 97  | sarcoma                               | 0.074 | 0.082 |
| 98  | neoplasm                              | 0.85  | 0.117 |
| 99  | hepatocellular carcinoma              | 0.112 | 0.087 |
| 100 | amyloidosis                           | 0.013 | 0.059 |
| 101 | ascites                               | 0.051 | 0.055 |
| 102 | systemic lupus erythematosus          | 0.063 | 0.013 |
| 103 | sarcoidosis                           | 0.081 | 0.01  |
| 104 | encephalomyelitis                     | 0.226 | 0.026 |
| 105 | necrosis                              | 0.064 | 0.015 |
| 106 | urinary bladder cancer                | 0.06  | 0.033 |
| 107 | fetal growth restriction              | 0.012 | 0.011 |
| 108 | malignant pancreatic neoplasm         | 0.058 | 0.094 |
| 109 | Becker muscular dystrophy             | 0.01  | 0.015 |
| 110 | liver neoplasm                        | 0.113 | 0.095 |
| 111 | myocardial infarction                 | 0.024 | 0.045 |
| 112 | breast carcinoma                      | 0.709 | 0.051 |

|     |                                         |       |       |
|-----|-----------------------------------------|-------|-------|
| 113 | systemic autoimmune disease             | 0.08  | 0.035 |
| 114 | infectious mononucleosis                | 0.087 | 0.011 |
| 115 | breast neoplasm                         | 0.716 | 0.056 |
| 116 | melanocytic nevus                       | 0.027 | 0.03  |
| 117 | acute kidney failure                    | 0.01  | 0.031 |
| 118 | Exstrophy-epispadias complex            | 0.019 | 0.017 |
| 119 | kidney neoplasm                         | 0.199 | 0.037 |
| 120 | oral squamous cell carcinoma            | 0.01  | 0.026 |
| 121 | glioma                                  | 0.788 | 0.025 |
| 122 | medulloblastoma                         | 0.042 | 0.037 |
| 123 | pancreatitis                            | 0.031 | 0.024 |
| 124 | acute lymphoblastic leukemia            | 0.065 | 0.061 |
| 125 | ovarian carcinoma                       | 0.697 | 0.076 |
| 126 | amyotrophic lateral sclerosis           | 0.036 | 0.041 |
| 127 | Neu-Laxova syndrome                     | 0.02  | 0.034 |
| 128 | stroke                                  | 0.084 | 0.01  |
| 129 | neuroblastoma                           | 0.082 | 0.052 |
| 130 | cervical carcinoma                      | 0.033 | 0.011 |
| 131 | kidney disease                          | 0.297 | 0.046 |
| 132 | cardiac hypertrophy                     | 0.011 | 0.041 |
| 133 | Graves disease                          | 0.012 | 0.01  |
| 134 | hypersensitivity reaction disease       | 0.261 | 0.036 |
| 135 | relapsing-remitting multiple sclerosis  | 0.11  | 0.006 |
| 136 | endometrium adenocarcinoma              | 0.024 | 0.024 |
| 137 | hypertension                            | 0.102 | 0.064 |
| 138 | respiratory failure                     | 0.067 | 0.01  |
| 139 | paraneoplastic neurologic syndrome      | 0.01  | 0.012 |
| 140 | hypoxia                                 | 0.046 | 0.023 |
| 141 | anaplastic astrocytoma                  | 0.045 | 0.011 |
| 142 | brain injury                            | 0.045 | 0.032 |
| 143 | breast cancer                           | 0.716 | 0.056 |
| 144 | undifferentiated carcinoma              | 0.048 | 0.018 |
| 145 | inflammation                            | 0.102 | 0.016 |
| 146 | urethral intrinsic sphincter deficiency | 0.043 | 0.012 |
| 147 | metastatic neoplasm                     | 0.05  | 0.021 |
| 148 | substance dependence                    | 0.062 | 0.014 |
| 149 | B-cell non-Hodgkins lymphoma            | 0.063 | 0.018 |
| 150 | gastric carcinoma                       | 0.042 | 0.017 |



**Table S8.** List of the human diseases associated with IFN- $\beta$ , S100A1, S100A4 and S100A6 proteins, according to DisGeNET database (<http://www.disgenet.org>).

| <i>Nº</i> | <i>Disease</i>                                 |
|-----------|------------------------------------------------|
| 1         | Malignant neoplasm of breast                   |
| 2         | Breast Carcinoma                               |
| 3         | Malignant neoplasm of urinary bladder          |
| 4         | Bladder Neoplasm                               |
| 5         | Malignant Neoplasms                            |
| 6         | Neoplasm Metastasis                            |
| 7         | Neoplasms                                      |
| 8         | Primary malignant neoplasm                     |
| 9         | Malignant neoplasm of lung                     |
| 10        | Liver carcinoma                                |
| 11        | Conventional (Clear Cell) Renal Cell Carcinoma |
| 12        | Non-Small Cell Lung Carcinoma                  |
| 13        | Tumor Cell Invasion                            |
| 14        | Tumor Progression                              |
| 15        | Secondary malignant neoplasm of lymph node     |
| 16        | Malignant neoplasm of stomach                  |
| 17        | Malignant neoplasm of pancreas                 |
| 18        | Malignant neoplasm of ovary                    |

**Table S9.** List of the human diseases associated with IFN- $\beta$ , S100A1, S100A4 and S100A6 proteins, according to Open Targets Platform database (<https://www.opentargets.org>), and corresponding association scores (<https://docs.targetvalidation.org/getting-started/scoring>). Diseases with association scores for the proteins exceeding 0.1 are highlighted in yellow.

| <i>Nº</i> | <i>Disease</i>                        | <i>IFN-<math>\beta</math></i> | <i>S100A1</i> | <i>S100A4</i> | <i>S100A6</i> |
|-----------|---------------------------------------|-------------------------------|---------------|---------------|---------------|
| 1         | adenocarcinoma                        | 0.783                         | 0.383         | 0.142         | 0.098         |
| 2         | Alzheimer's disease                   | 0.044                         | 0.04          | 0.004         | 0.03          |
| 3         | amyloidosis                           | 0.013                         | 0.024         | 0.037         | 0.059         |
| 4         | anaplastic astrocytoma                | 0.045                         | 0.011         | 0.011         | 0.011         |
| 5         | astrocytoma                           | 0.676                         | 0.015         | 0.123         | 0.025         |
| 6         | breast adenocarcinoma                 | 0.029                         | 0.011         | 0.047         | 0.049         |
| 7         | breast cancer                         | 0.716                         | 0.046         | 0.242         | 0.056         |
| 8         | cancer                                | 0.839                         | 0.538         | 0.346         | 0.116         |
| 9         | carcinoma                             | 0.839                         | 0.537         | 0.264         | 0.115         |
| 10        | cardiac hypertrophy                   | 0.011                         | 0.041         | 0.027         | 0.041         |
| 11        | cervical cancer                       | 0.047                         | 0.036         | 0.05          | 0.05          |
| 12        | chronic obstructive pulmonary disease | 0.087                         | 0.012         | 0.071         | 0.04          |
| 13        | cirrhosis of liver                    | 0.061                         | 0.2           | 0.071         | 0.043         |
| 14        | clear cell renal carcinoma            | 0.024                         | 0.013         | 0.041         | 0.036         |
| 15        | colorectal carcinoma                  | 0.063                         | 0.011         | 0.208         | 0.094         |
| 16        | complication                          | 0.078                         | 0.011         | 0.014         | 0.01          |
| 17        | cutaneous melanoma                    | 0.038                         | 0.02          | 0.038         | 0.036         |
| 18        | dysplasia                             | 0.029                         | 0.017         | 0.046         | 0.016         |
| 19        | endometrial carcinoma                 | 0.061                         | 0.031         | 0.089         | 0.038         |
| 20        | glioblastoma multiforme               | 0.676                         | 0.031         | 0.123         | 0.038         |
| 21        | glioma                                | 0.788                         | 0.021         | 0.13          | 0.025         |
| 22        | heart failure                         | 0.015                         | 0.303         | 0.017         | 0.034         |
| 23        | hyperplasia                           | 0.051                         | 0.018         | 0.026         | 0.027         |
| 24        | hypoxia                               | 0.046                         | 0.064         | 0.083         | 0.023         |
| 25        | idiopathic pulmonary fibrosis         | 0.031                         | 0.193         | 0.1           | 0.01          |
| 26        | infectious disease                    | 0.295                         | 0.198         | 0.219         | 0.033         |
| 27        | inflammation                          | 0.102                         | 0.061         | 0.068         | 0.016         |
| 28        | injury                                | 0.075                         | 0.036         | 0.078         | 0.06          |
| 29        | kidney neoplasm                       | 0.199                         | 0.066         | 0.088         | 0.037         |
| 30        | lung carcinoma                        | 0.646                         | 0.424         | 0.164         | 0.101         |
| 31        | lymph node metastatic carcinoma       | 0.029                         | 0.037         | 0.066         | 0.035         |
| 32        | malignant pancreatic neoplasm         | 0.058                         | 0.011         | 0.208         | 0.094         |
| 33        | medulloblastoma                       | 0.042                         | 0.062         | 0.036         | 0.037         |
| 34        | melanoma                              | 0.141                         | 0.047         | 0.082         | 0.073         |

|    |                                         |       |       |       |       |
|----|-----------------------------------------|-------|-------|-------|-------|
| 35 | myocardial infarction                   | 0.024 | 0.07  | 0.047 | 0.045 |
| 36 | necrosis                                | 0.064 | 0.012 | 0.019 | 0.015 |
| 37 | neoplasm                                | 0.85  | 0.586 | 0.351 | 0.117 |
| 38 | nervous system disease                  | 0.85  | 0.322 | 0.273 | 0.15  |
| 39 | nervousness                             | 0.066 | 0.018 | 0.035 | 0.038 |
| 40 | neuroblastoma                           | 0.082 | 0.01  | 0.059 | 0.052 |
| 41 | nicotine dependence                     | 0.06  | 0.013 | 0.018 | 0.004 |
| 42 | non-small cell lung carcinoma           | 0.646 | 0.004 | 0.159 | 0.097 |
| 43 | obesity                                 | 0.198 | 0.02  | 0.081 | 0.01  |
| 44 | ovarian carcinoma                       | 0.697 | 0.082 | 0.138 | 0.076 |
| 45 | pulmonary arterial hypertension         | 0.102 | 0.309 | 0.076 | 0.013 |
| 46 | renal cell adenocarcinoma               | 0.078 | 0.061 | 0.084 | 0.037 |
| 47 | sepsis                                  | 0.155 | 0.007 | 0.012 | 0.037 |
| 48 | shock                                   | 0.044 | 0.016 | 0.039 | 0.061 |
| 49 | squamous cell carcinoma                 | 0.055 | 0.43  | 0.088 | 0.048 |
| 50 | stomach neoplasm                        | 0.064 | 0.368 | 0.103 | 0.091 |
| 51 | substance dependence                    | 0.062 | 0.027 | 0.02  | 0.014 |
| 52 | urethral intrinsic sphincter deficiency | 0.043 | 0.018 | 0.069 | 0.012 |
| 53 | urinary bladder cancer                  | 0.06  | 0.049 | 0.074 | 0.033 |

**Table S10.** List of the human diseases associated with IFN- $\beta$ , S100A1, S100A4, S100A6 and S100P proteins, according to Open Targets Platform database (<https://www.opentargets.org>), and corresponding association scores (<https://docs.targetvalidation.org/getting-started/scoring>). Diseases with association scores for the proteins exceeding 0.1 are highlighted in yellow.

| <i>Nº</i> | <i>Disease</i>                  | <i>IFN-<math>\beta</math></i> | <i>S100A1</i> | <i>S100A4</i> | <i>S100A6</i> | <i>S100P</i> |
|-----------|---------------------------------|-------------------------------|---------------|---------------|---------------|--------------|
| 1         | adenocarcinoma                  | 0.783                         | 0.383         | 0.142         | 0.098         | 0.122        |
| 2         | cancer                          | 0.839                         | 0.538         | 0.346         | 0.116         | 0.262        |
| 3         | carcinoma                       | 0.839                         | 0.537         | 0.264         | 0.115         | 0.229        |
| 4         | colorectal carcinoma            | 0.063                         | 0.011         | 0.208         | 0.094         | 0.219        |
| 5         | dysplasia                       | 0.029                         | 0.017         | 0.046         | 0.016         | 0.028        |
| 6         | hyperplasia                     | 0.051                         | 0.018         | 0.026         | 0.027         | 0.016        |
| 7         | hypoxia                         | 0.046                         | 0.064         | 0.083         | 0.023         | 0.018        |
| 8         | inflammation                    | 0.102                         | 0.061         | 0.068         | 0.016         | 0.024        |
| 9         | lung carcinoma                  | 0.646                         | 0.424         | 0.164         | 0.101         | 0.075        |
| 10        | lymph node metastatic carcinoma | 0.029                         | 0.037         | 0.066         | 0.035         | 0.02         |
| 11        | medulloblastoma                 | 0.042                         | 0.062         | 0.036         | 0.037         | 0.023        |
| 12        | melanoma                        | 0.141                         | 0.047         | 0.082         | 0.073         | 0.051        |
| 13        | myocardial infarction           | 0.024                         | 0.07          | 0.047         | 0.045         | 0.031        |
| 14        | neoplasm                        | 0.85                          | 0.586         | 0.351         | 0.117         | 0.299        |
| 15        | ovarian carcinoma               | 0.697                         | 0.082         | 0.138         | 0.076         | 0.071        |
| 16        | pulmonary arterial hypertension | 0.102                         | 0.309         | 0.076         | 0.013         | 0.01         |
| 17        | sepsis                          | 0.155                         | 0.007         | 0.012         | 0.037         | 0.061        |
| 18        | squamous cell carcinoma         | 0.055                         | 0.43          | 0.088         | 0.048         | 0.051        |
